# Supplementary material for: Modulating absorption and charge transfer in bodipy-carbazole donor–acceptor dyads through molecular design
Source: Royal Society of Chemistry journal article supplement (doi:10.1039/c9dt00094a), 2019-01-01
Supplement: c9dt00094a1.pdf [file c9dt00094a1.pdf]

## Supporting Information

# Modulating Absorption and Charge Transfer in Bodipy-Carbazole Donor-Acceptor Dyads through Molecular Design

*John Strahan<sup>a</sup>, Bhooshan C. Popere<sup>b,d</sup>, Piyachai Khomein<sup>b</sup>, Craig Pointer<sup>c</sup>, Shea Martin<sup>c</sup>,  
Amanda N. Oldacre<sup>c</sup>, S. Thayumanavan<sup>b\*</sup>, Elizabeth R. Young<sup>c\*</sup>*

a. Department of Chemistry, Amherst College, Amherst, Massachusetts 01002, USA. Fax: +1-413-542-2735

b. Department of Chemistry, University of Massachusetts, Amherst, Massachusetts 01003, USA. E-mail:thai@chem.umass.edu; Fax: +1-413-545-4490

c. Department of Chemistry, Lehigh University, Bethlehem, Pennsylvania 18015, USA. Email: ery317@lehigh.edu; Fax: +1-610-758-6536

d. Current address: The Dow Chemical Company, 455 Forest Street, Marlborough, MA 01752

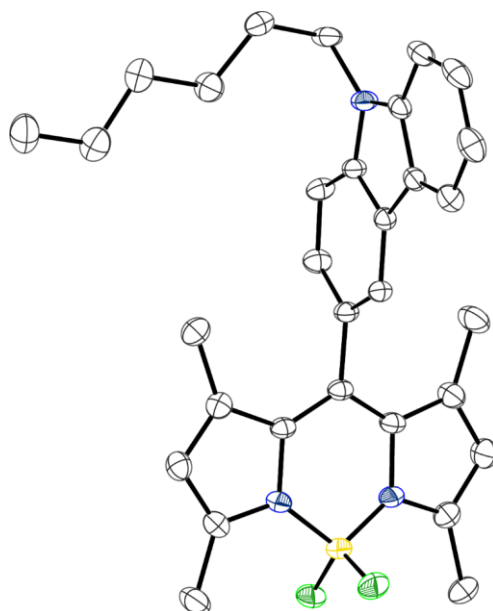

**Figure S1.** Oak Ridge Thermal Ellipsoid Plot (ORTEP) of *meso***BDP-Carb** at the 30% probability level. Hydrogen atoms removed for clarity.

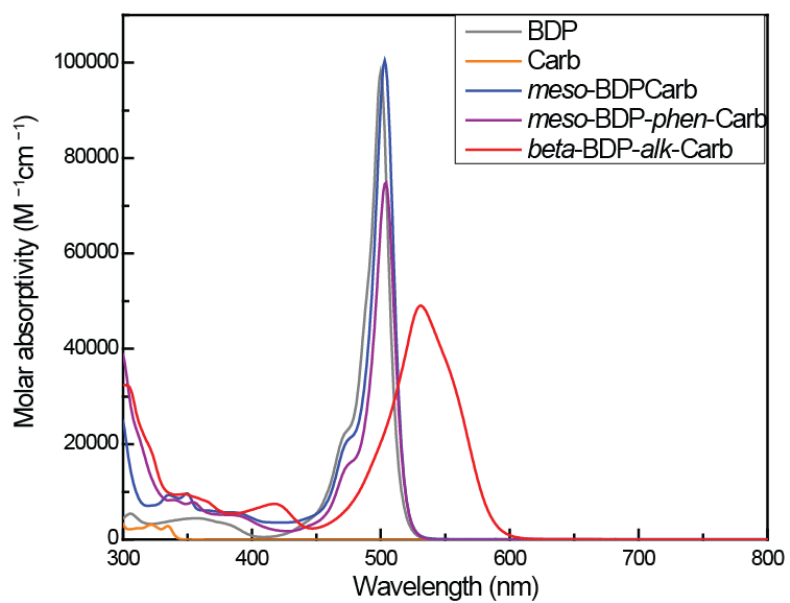

**Figure S2.** UV-visible absorption spectra in molar absorptivity extending to the UV region for each BDP-Carb dyad as well as the unsubstituted BDP and carbazole moieties.

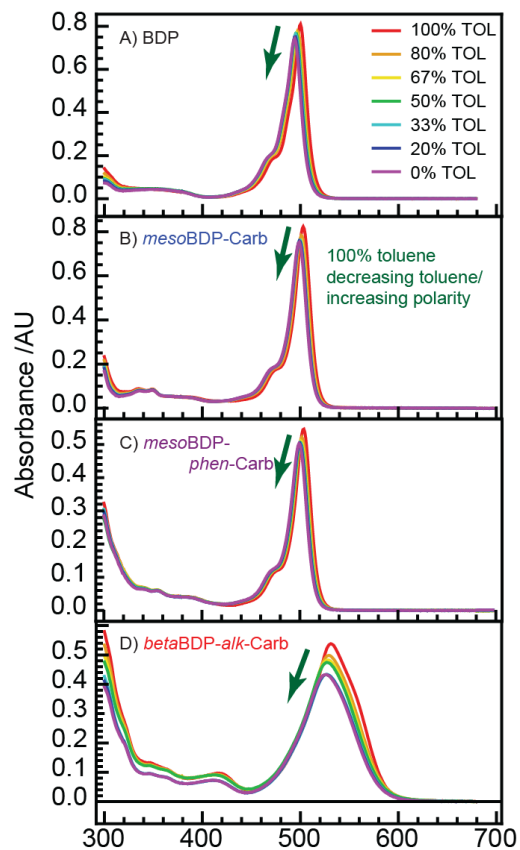

**Figure S3.** Solvent polarity dependence of absorption spectra of A) **BDP**, B) ***meso*BDP-Carb**, C) ***meso*BDP-*phen*-Carb**, D) ***beta*BDP-*alk*-Carb**. Samples were 2  $\mu$ M in the solvent ratio of toluene/acetonitrile indicated in the legend (shifting from red as the most non-polar to blue as the most polar in rainbow order, and as indicated by the green arrow).

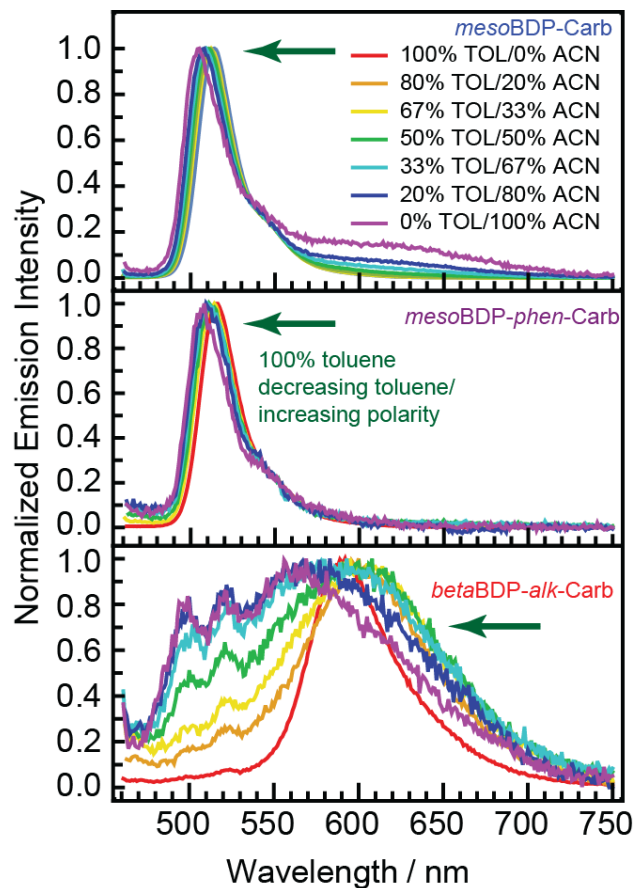

**Figure S4.** Normalized emission spectra showing solvent polarity dependence. Samples were 0.1  $\mu\text{M}$  in the solvent ratio of toluene/acetonitrile indicated in the legend (shifting from red as the most non-polar to blue as the most polar in rainbow order). Samples were excited at 450 nm.

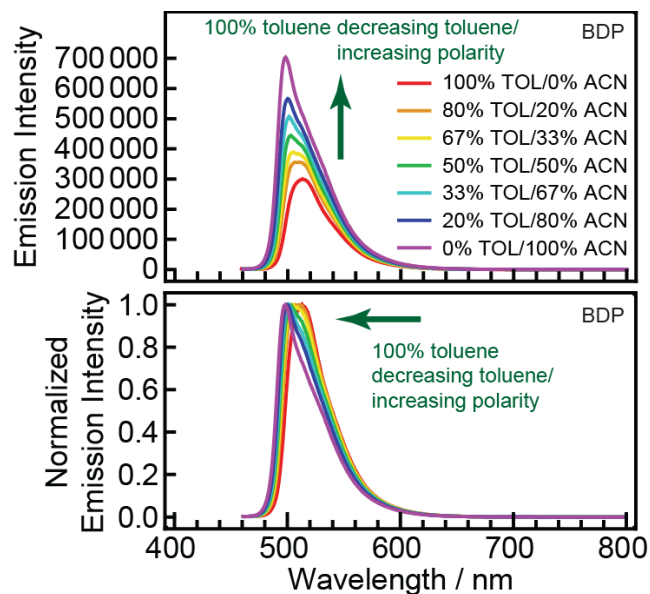

**Figure S5.** Solvent polarity dependence of emission spectra of BDP (top) and normalized emission intensity (bottom). Samples were 0.1  $\mu\text{M}$  in the solvent ratio of toluene/acetonitrile indicated in the legend (shifting from red as the most non-polar to blue as the most polar in rainbow order). Samples were excited at 450 nm.

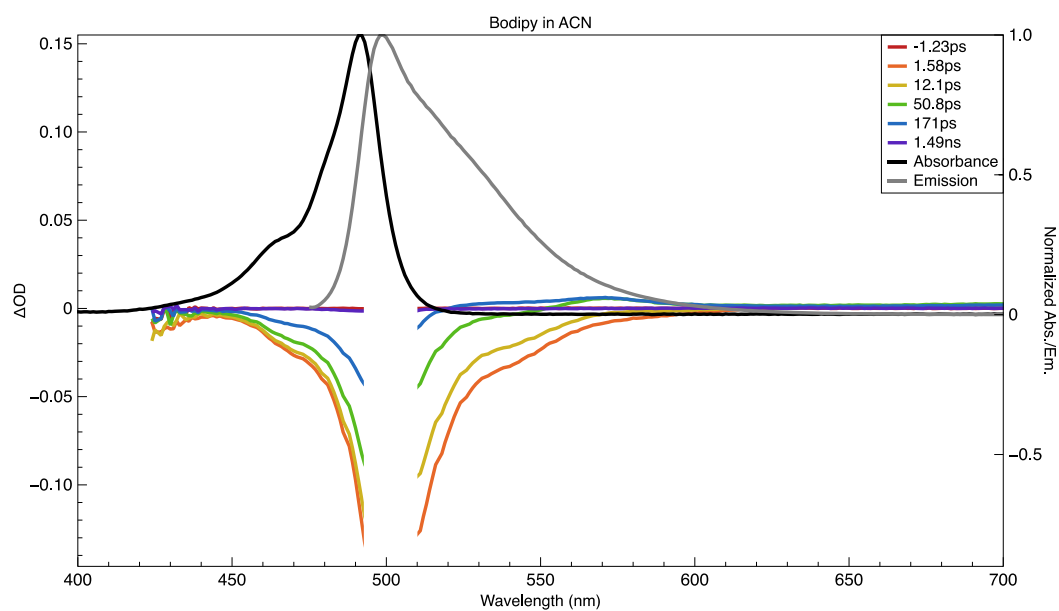

**Figure S6.** Overlay of transient absorption spectra with the steady-state absorption (black) and emission (grey) spectra for BDP in acetonitrile. Gaps in the spectra correspond to removal of scatter laser excitation light around 500 nm.

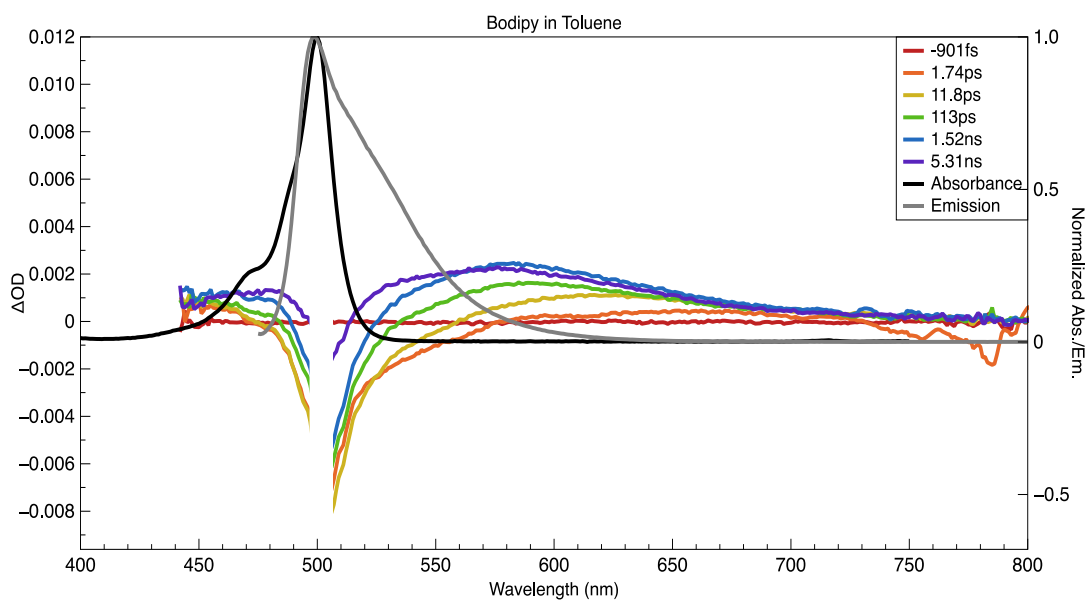

**Figure S7.** Overlay of transient absorption spectra with the steady-state absorption (black) and emission (grey) spectra for BDP in toluene. Gaps in the spectra correspond to removal of scatter laser excitation light around 500 nm.



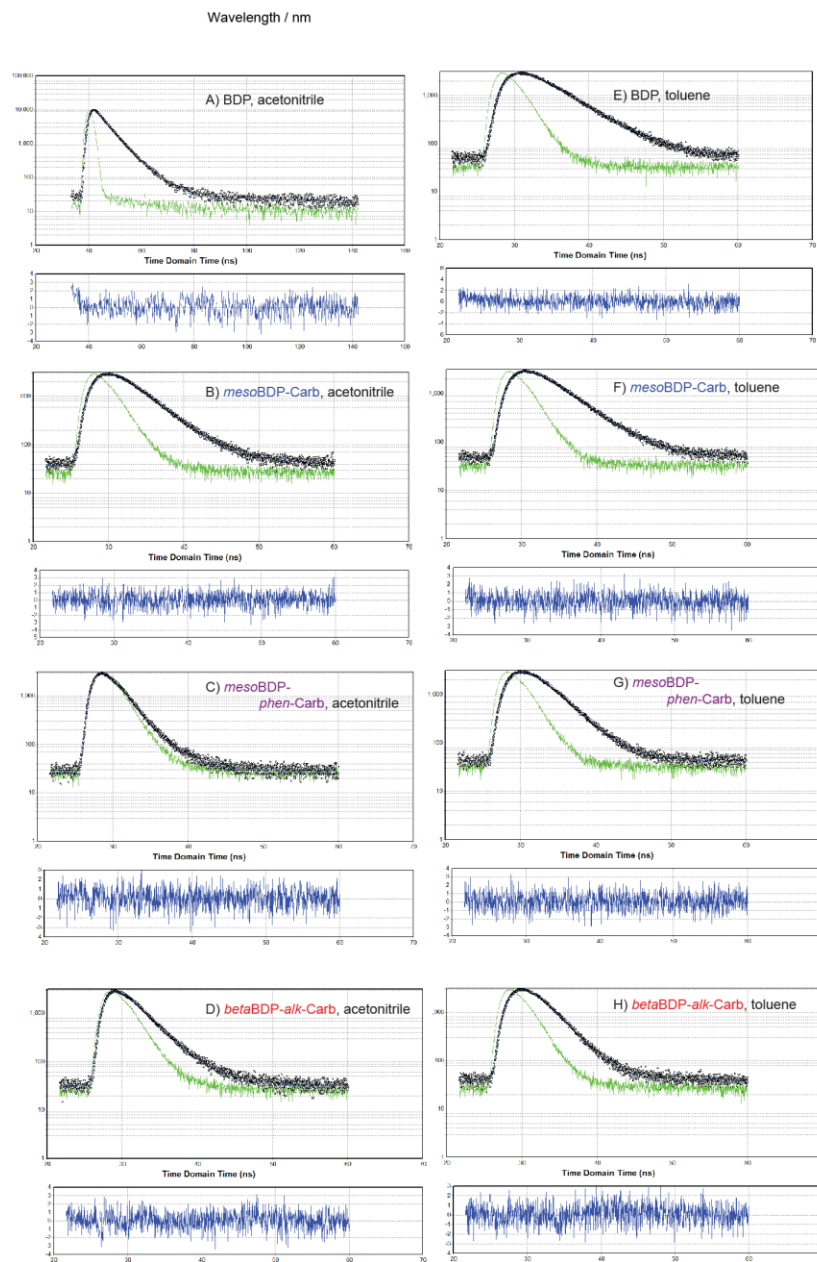

**Figure S8.** Time-correlated single photon counting (TCSPC) data. TCSPC data (black dots) are deconvolved from the instrument response function, IRF (green line). Fits are shown for each set of data (blue line, matching well with the black dots of data). Residuals (blue lines in lower tile) are shown in the tile below each set of data. The extracted lifetimes are summarized Table 2 for both solvents. Samples ( $\sim 0.1 \mu\text{M}$ ) were prepared in an inert glovebox environment a 1-cm quartz cuvette. The cuvettes were sealed to preserve an air-free sample and removed from the glovebox for experiments. Measurements were collected in acetonitrile (left tiles) and toluene (right tiles). Samples were excited with a 470 nm pulsed nanoLED and the entire emission spectrum was integrated to produce the emission decay trace. A 500-nm long pass filter was used to remove scattered excitation. Lifetimes were extracted by fitting a convolution of the IRF (green trace) and a multiexponential decay to the data using ISS Vinci2 software.

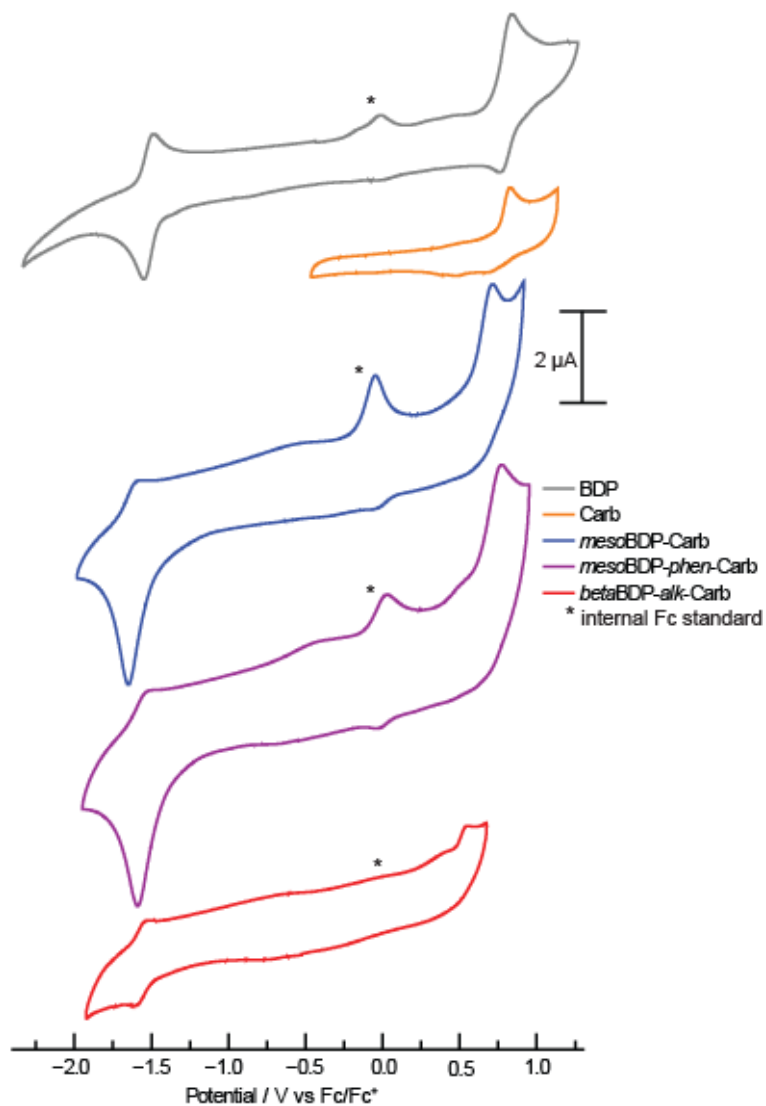

**Figure S9.** Cyclic voltammograms of 60  $\mu\text{M}$  BDP, Carb, and each BDP-Carb dyad in 0.1 M TBABF<sub>4</sub> in acetonitrile. Voltammetry scans were recorded with a platinum working electrode, a platinum counter electrode, and a silver wire quasi reference electrode using an internal ferrocene standard.

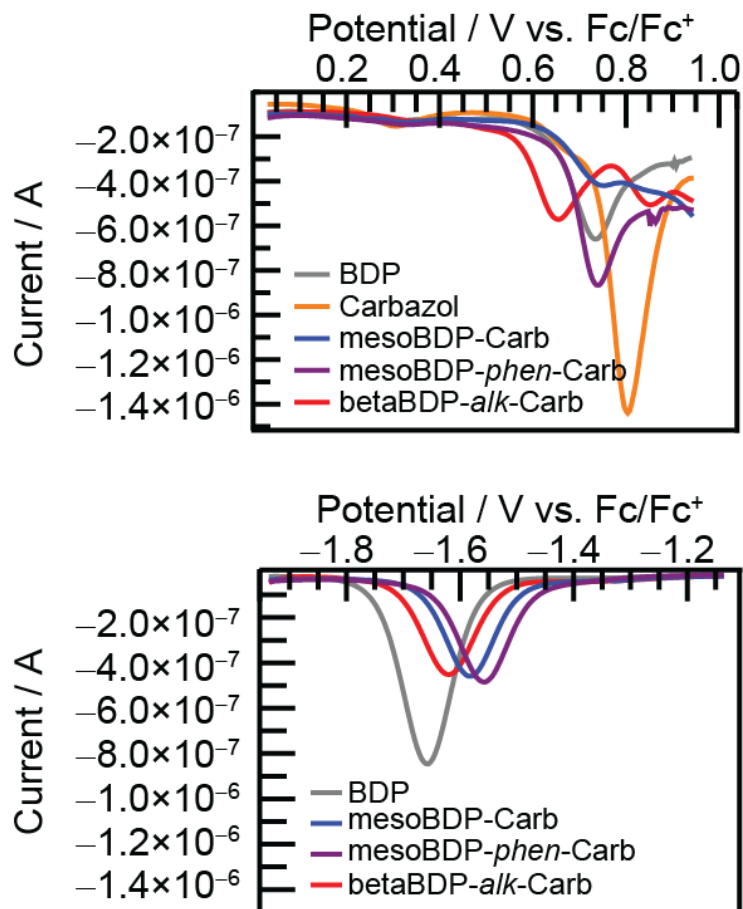

**Figure S10.** Differential pulse voltammograms of 60  $\mu\text{M}$  BDP, Carbazol, and each BDP-Carb dyad in 0.1 M TBABF<sub>4</sub> in acetonitrile. Voltammetry scans were recorded with a platinum working electrode, a platinum counter electrode, and a silver wire quasi reference electrode using an internal ferrocene standard. Top tile represents oxidative scans, bottom tile represents reductive scans.

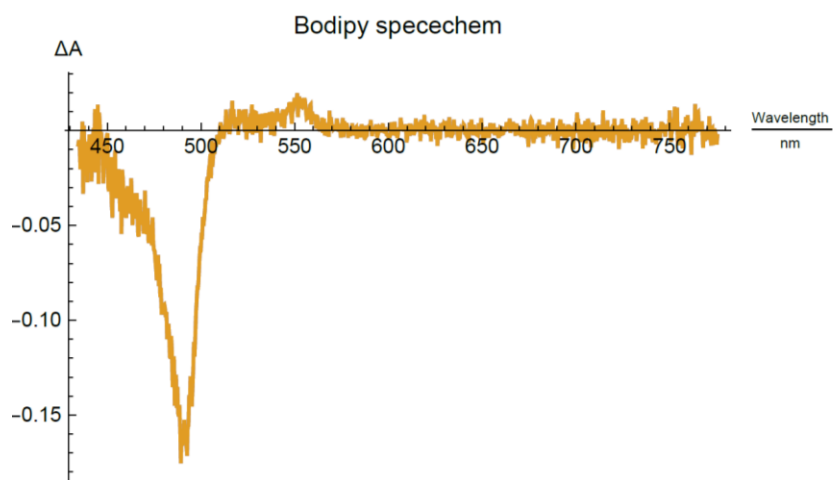

**Figure S11.** Reductive spectroelectrochemistry of BDP alone. Spectroelectrochemistry was performed using a 30  $\mu\text{M}$  solution of BDP in 0.1 M  $\text{TBABF}_4$  in acetonitrile using a platinum mesh working electrode, a platinum counter electrode, and a silver wire quasi-reference electrode. Samples were prepared and experiments were performed in an inert glovebox environment.

## Calculated Molecular Orbital from Density Functional Theory

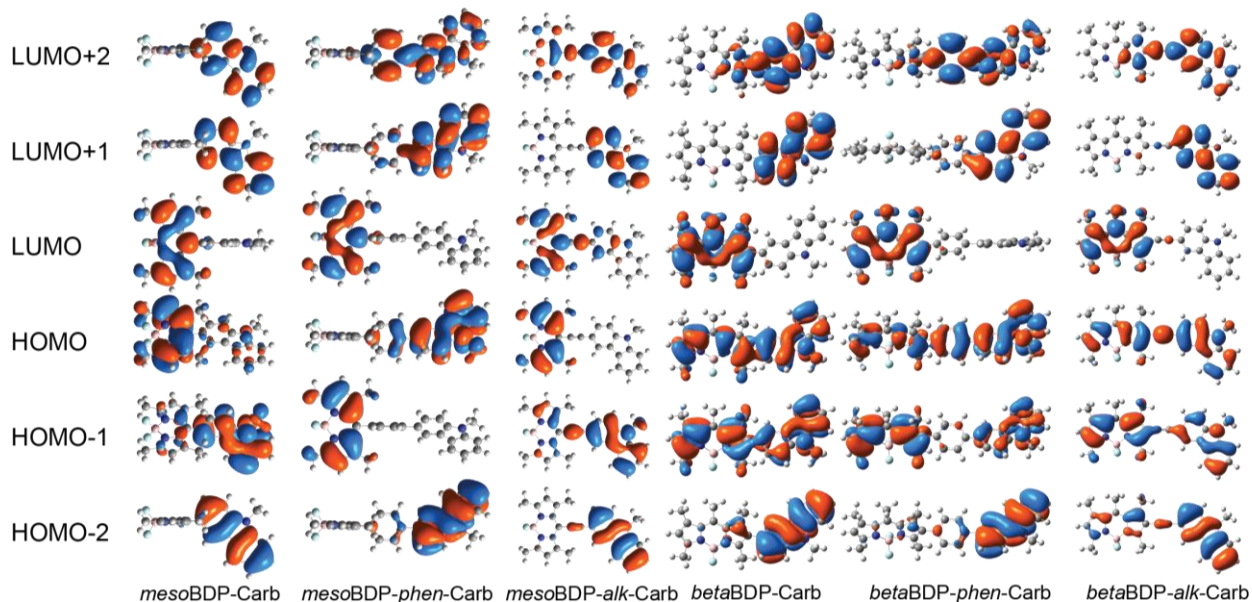

## Calculated Orbital Energies from Density Functional Theory

| Molecule                  | HOMO-1 | HOMO  | LUMO  | LUMO+1 | $\Delta$ LUMO-HOMO |
|---------------------------|--------|-------|-------|--------|--------------------|
| BDP                       | -4.32  | -3.55 | -0.25 | 3.31   | 3.30               |
| <i>beta</i> BDP-Carb      | -5.87  | -5.56 | -2.67 | -1.25  | 2.89               |
| <i>beta</i> BDP-alk-Carb  | -5.98  | -5.39 | -2.78 | -1.31  | 2.61               |
| <i>beta</i> BDP-phen-Carb | -5.80  | -5.55 | -2.70 | -1.26  | 2.85               |
| <i>meso</i> BDP-Carb      | -5.83  | -5.77 | -2.74 | -1.34  | 3.03               |
| <i>meso</i> BDP-alk-Carb  | -5.82  | -5.81 | -3.03 | -1.42  | 2.78               |
| <i>meso</i> BDP-phen-Carb | -5.95  | -5.67 | -2.91 | -1.21  | 2.76               |

*DFT orbital energies, reported versus vacuum in units of eV.*

**Figure S12.** Molecular orbitals energy levels obtained from DFT calculations using the ORCA quantum chemistry package the B3LYP functional and a def2-TZVP basis set. Calculations were performed in vacuum. HOMO and LUMO energy levels yield insight to the trends observed in experimental UV-visible spectroscopy.

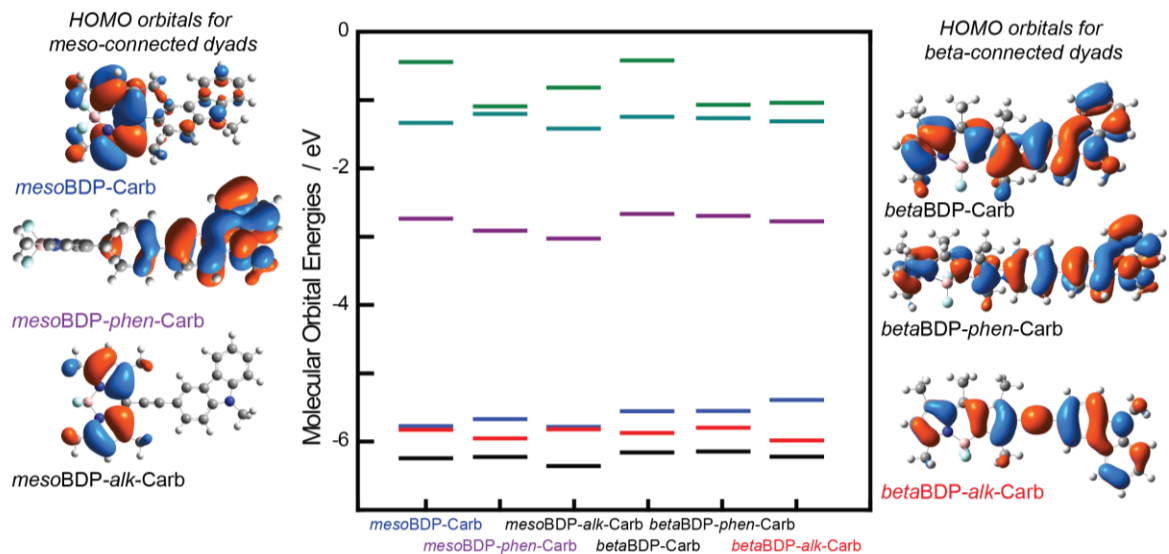

**Figure S13.** Plotted molecular orbitals energy levels and corresponding HOMO orbitals obtained from DFT calculations with Gaussian using the B3LYP functional and a def2-TZVP basis set.

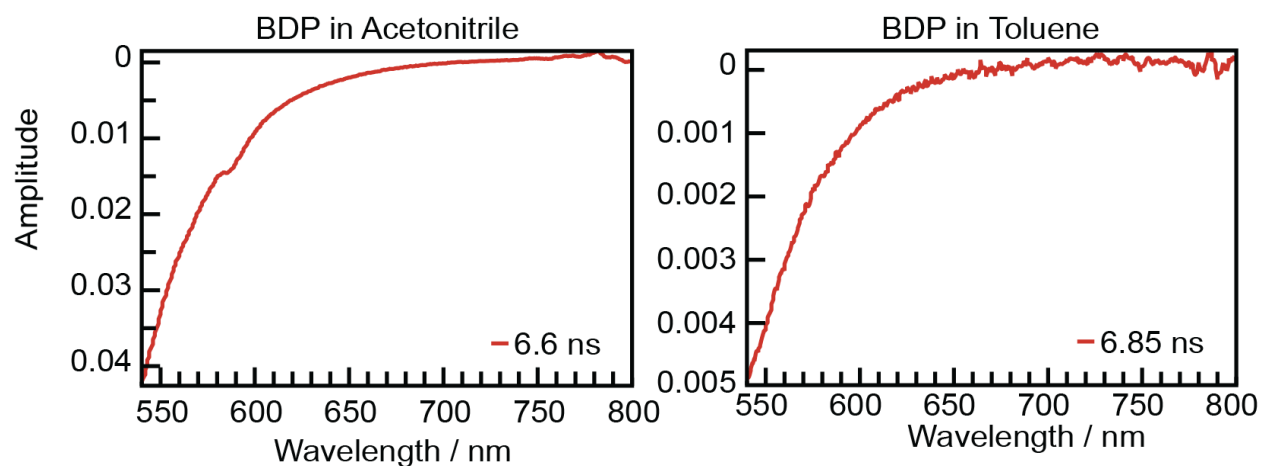

**Figure S14.** Global analysis DADS of BDP in acetonitrile and toluene.

## Experimental Details

### Instrumentation

$^1\text{H}$  and  $^{13}\text{C}$  NMR spectra were recorded on a 500 (125) MHz Bruker NMR spectrometer using the residual resonance of the solvent as the internal standard. Chemical shifts are reported in parts per million (ppm). When peak multiplicities are given, the following abbreviations are used: s, singlet; d, doublet; t, triplet; m, multiplet; b, broad. Molar absorptivity was acquired with Cary 5000 UV-vis-NIR spectrometer. ATR-FT-IR data was obtained with a Thermo Scientific Nicolet iS10 with an ATR attachment.

### Materials and Synthetic Procedures

All reagents were obtained from commercial sources used as received without further purification, unless otherwise specified. Air- and moisture-sensitive reactions were conducted in oven-dried glassware using a standard Schlenk line or dry box techniques under an inert atmosphere of dry nitrogen. THF was dried over sodium and collected *via* distillation immediately prior to use. *N,N*-diisopropylamine was dried over anhydrous calcium hydride, collected by distillation under reduced pressure and stored in airtight Strauss' flasks under a positive argon pressure.

#### 5.6.3 Detailed Synthetic Procedures

##### *meso*-methyl BODIPY (1)<sup>1</sup>

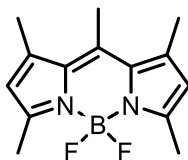

To a solution of 2,4-dimethylpyrrole (2 g, 21 mmol) in dry  $\text{CH}_2\text{Cl}_2$  (20 mL) was added acetyl chloride (3.84 g, 49 mmol) dropwise at room temperature over 30 min. The resulting deep-red solution was heated to reflux for 1 h. After cooling, the reaction mixture was poured into 50 mL hexanes and the resulting orange suspension was concentrated to dryness. The resulting dypirrin hydrochloride was used without further purification. This was then dissolved in dry  $\text{CH}_2\text{Cl}_2$  (100 mL) and to this solution was added  $\text{Et}_3\text{N}$  (8.9 mL, 63 mmol) and the solution was stirred at room temperature for 10 min. Subsequently,  $\text{BF}_3\cdot\text{OEt}_2$  (11.5 mL, 91 mmol) was added to the flask slowly, but not dropwise, and the reaction mixture was stirred at room temperature for 1 h. The deep red solution was washed with saturated aq.  $\text{Na}_2\text{CO}_3$  solution, dried over anhydrous  $\text{MgSO}_4$  and concentrated *in vacuo*. The crude product was then purified by silica gel chromatography using Combiflash Rf-200 automated flash chromatograph with hexanes- $\text{CH}_2\text{Cl}_2$  as the eluents. The product was further purified *via* recrystallization from  $\text{CH}_2\text{Cl}_2/\text{MeOH}$  to yield long orange crystals (1.9 g, 70%). UV-vis (toluene):  $\lambda_{\text{max}} = 500 \text{ nm}$ ,  $\epsilon = 98,000 \text{ M}^{-1}\text{cm}^{-1}$  ATR-FT-IR ( $\text{cm}^{-1}$ ): 2985 (w,  $\text{sp}^3 \text{C-H}$ )  $^1\text{H}$  NMR (500 MHz  $\text{CDCl}_3$ ):  $\delta$  ppm 6.05 (s, 2H), 2.57 (s, 3H), 2.52 (s, 6H), 2.41 (s, 6H).

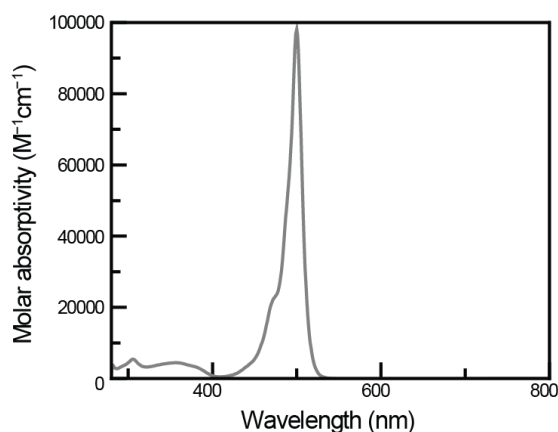

**Figure S14.** UV-Vis (molar absorptivity) of *meso*-methyl BODIPY in toluene



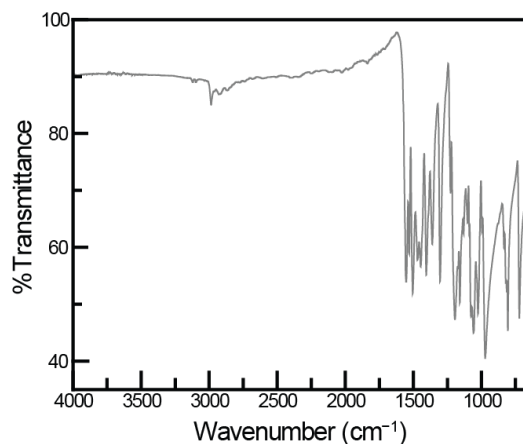

**Figure S15.** ATR-FT-IR of *meso*-methyl BODIPY

**2-Iodo *meso*-methyl BDP (2)<sup>2</sup>**

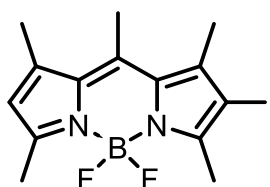

BDP **1** (350 mg, 1.33 mmol) was dissolved in dry CH<sub>2</sub>Cl<sub>2</sub> (200 mL). *N*-iodosuccinimide (330 mg, 1.5 mmol) was dissolved in DMF (5 mL) and added dropwise to the stirring solution of **1** at room temperature. The reaction was stirred for 12 h after which, it was quenched with water. The crude product was extracted into ether. The organic fractions were dried over anhydrous MgSO<sub>4</sub> and concentrated *in vacuo*. The crude product was then purified by silica gel chromatography using Combiflash Rf-200 automated flash chromatograph with hexanes-CH<sub>2</sub>Cl<sub>2</sub> as the eluents. The product was further purified *via* recrystallization from CH<sub>2</sub>Cl<sub>2</sub>/MeOH to yield an orange solid (355 mg, 70%). <sup>1</sup>H NMR (400 MHz, CDCl<sub>3</sub>): δ ppm 6.12 (*s*, 1H), 2.61 (*s*, 3H), 2.60 (*s*, 3H), 2.53 (*s*, 3H), 2.45 (*s*, 3H), 2.43 (*s*, 3H).

### 3-Bromocarbazole<sup>3</sup>

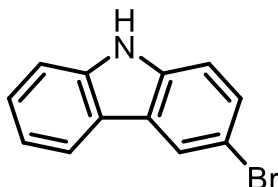

To a suspension of carbazole (2 g, 12 mmol) in DMF (10 mL) was added a solution of *N*-bromosuccinimide (2.1 g, 11.9 mmol) in DMF (10 mL) was added dropwise at 0°C. The reaction mixture was warmed to room temperature and stirred for additional 5 h. The reaction was quenched with water and the product was extracted with CH<sub>2</sub>Cl<sub>2</sub>. The organic fractions were dried over MgSO<sub>4</sub> and dried over anhydrous MgSO<sub>4</sub>. The crude product was then purified by silica gel chromatography using Combiflash Rf-200 automated flash chromatograph with hexanes-ethyl acetate as the eluents. Solvents were removed *in vacuo* and the resulting white solid was used as such without further analysis for the next reaction.

### 3-Bromo-*N*-hexylcarbazole (4)<sup>3</sup>

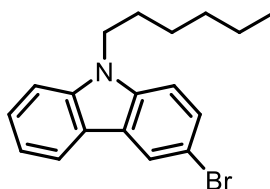

A solution of 3-bromo carbazole (2.3 g, 9.5 mmol) in DMF (100 mL) and anhydrous K<sub>2</sub>CO<sub>3</sub> (2.6 g, 19 mmol) was added 1-bromohexane (1.89 g, 11.5 mmol). The reaction was stirred at 80°C for 12 h. After cooling the reaction was quenched with water and the crude product was extracted with ethyl acetate. The organic fraction was dried over anhydrous MgSO<sub>4</sub> and concentrated *in vacuo*. The crude product was then purified by silica gel chromatography using Combiflash Rf-200

automated flash chromatograph with hexanes as the eluents. The solvent was evaporated under reduced pressure to yield a waxy white solid (1.5 g, 50%).  $^1\text{H}$  NMR (400 MHz;  $\text{CDCl}_3$ ):  $\delta$  ppm 8.20 (*d*,  $J = 2.0$  Hz, 1H), 8.05 (*d*,  $J = 7.8$  Hz, 1H), 7.53 (*dd*,  $J = 8.6, 2.0$  Hz, 1H), 7.51 (*m*,  $J = 1.2$  Hz, 1H), 7.40 (*d*,  $J = 8.2$  Hz, 1H), 7.29-7.27 (*m*, 1H), 7.26-7.22 (*m*, 1H), 4.27 (*t*,  $J = 7.3$  Hz, 2H), 1.88 (*m*, 2H), 1.39-1.26 (*m*, 6H), 0.87 (*t*,  $J = 7.1$  Hz, 3H).

***N*-Hexyl-2-(4,4,5,5-tetramethyl-1,3,2-dioxaborolan-2-yl)-carbazole (5)**

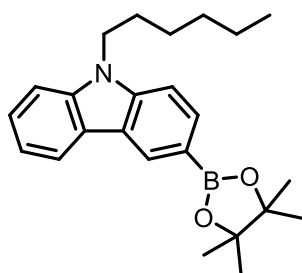

A solution of 3-bromo-*N*-hexyl carbazole (**4**) (1 g, 3 mmol) in dry THF (30 mL) was cooled to  $-78^\circ\text{C}$ . To this *n*BuLi (2.4 mL, 1.6 M in hexanes, 3.9 mmol) was added dropwise and the reaction was stirred for 1 h after which, it was warmed to room temperature. The reaction mixture was once again cooled to  $-78^\circ\text{C}$  and 2-isopropoxy-4,4,5,5-tetramethyl-1,3,2-dioxaborolane (0.84 g, 4.5 mmol) was added. The reaction mixture was allowed to warm to room temperature and was stirred for 12 h, after which it was quenched with water. The crude product was extracted with ethyl acetate. The organic fraction was dried over anhydrous  $\text{MgSO}_4$  and concentrated *in vacuo*. The crude product was then purified by silica gel chromatography using Combiflash Rf-200 automated flash chromatograph with hexanes-ethyl acetate as the eluents. Evaporation of the solvents afforded a pale yellow oil (0.74 g, 65%).  $^1\text{H}$  NMR (400 MHz;  $\text{CDCl}_3$ ):  $\delta$  ppm 8.63 (*t*,  $J = 0.9$  Hz, 1H), 8.16 (*d*,  $J = 7.7$  Hz, 1H), 7.95 (*dd*,  $J = 8.2, 1.2$  Hz, 1H), 7.51-7.47 (*m*,  $J = 1.2$  Hz, 1H), 7.44-

7.41 (*m*, 2H), 7.29-7.25 (*m*, 1H), 4.33 (*t*,  $J = 7.3$  Hz, 2H), 1.89 (*quintet*,  $J = 7.4$  Hz, 2H), 1.43 (*s*, 12H) 1.35-1.29 (*m*, 6H), 0.88 (*t*,  $J = 7.1$  Hz, 3H).

#### ***N*-Hexylcarbazole-3-carbaldehyde (6)<sup>4</sup>**

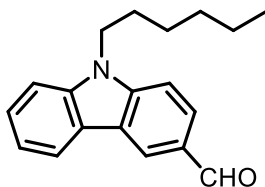

A solution of 3-bromo-*N*-hexyl carbazole (**4**) (3 g, 9 mmol) in anhydrous THF (200 mL) was cooled to  $-78^{\circ}\text{C}$ . *n*BuLi (6.8 mL, 1.6 M in hexanes, 10.9 mmol) was added dropwise and the reaction was allowed to warm to room temperature. After stirring for 30 min at room temperature, DMF (1.7 mL, 22 mmol) was added to the reaction mixture and was stirred for an additional 2 h. The mixture was then quenched with 2M HCl (15 mL) and the crude product was extracted with diethyl ether. The organic fractions were dried over anhydrous  $\text{MgSO}_4$  and concentrated in vacuo. The crude product was then purified by silica gel chromatography using Combiflash Rf-200 automated flash chromatograph with hexanes-ethyl acetate as the eluents. Evaporation of the solvents under reduced pressure afforded a pale yellow oil (1.9 g, 75%).  $^1\text{H}$  NMR (300 MHz,  $\text{CDCl}_3$ ):  $\delta$  ppm 10.10 (*s*, 1H), 8.62 (*d*,  $J = 1.5$  Hz, 1H), 8.16 (*d*,  $J = 7.8$  Hz, 1H), 8.01 (*dd*,  $J = 8.6$  Hz, 1H), 7.57–7.44 (*m*, 3H), 7.33 (*m*, 1H), 4.34 (*t*,  $J = 7.2$  Hz, 2H), 1.90 (*m*, 2H), 1.38–1.25 (*m*, 6H), 0.87 (*t*,  $J = 7.1$  Hz, 3H).

#### **2-trimethylsilylethynyl BDP**

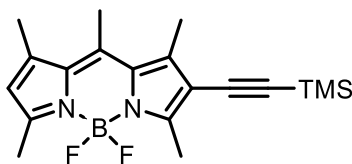

2-Iodo BDP **2** (250 mg, 0.64 mmol) was dissolved in *N,N*-diisopropyl amine (10 mL). To this solution were added Pd(PPh<sub>3</sub>)<sub>2</sub>Cl<sub>2</sub> (23 mg, 5 mol%) and CuI (12 mg, 10%) and the contents were purged with Ar. Trimethylsilylacetylene (0.18 mL, 1.28 mmol) was syringed into the flask and the reaction was heated to 90°C for 6 h. The solvent was evaporated and the crude product was purified by silica gel chromatography using Combiflash Rf-200 automated flash chromatograph with hexanes-CH<sub>2</sub>Cl<sub>2</sub> as the eluents. Evaporation of the solvents yielded an orange-red solid (200 mg, 56%). <sup>1</sup>H NMR (400 MHz; CDCl<sub>3</sub>): δ ppm 6.10 (*s*, 1H), 2.59 (*s*, 6H), 2.53 (*s*, 3H), 2.48 (*s*, 3H), 2.42 (*s*, 3H), 0.26 (*s*, 9H).

### 2-ethynyl BODIPY (**3**)

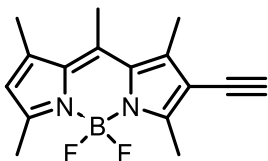

trimethylsilylethynyl BDP (200 mg, 0.6 mmol) was dissolved in freshly distilled THF (10 mL), purged with argon and the solution was cooled to -70 °C. A solution of TBAF in THF (1M) (1.9 mL, 1.9 mmol) was added dropwise *via* a syringe over 10 minutes. The reaction mixture was then removed from the cooling bath and stirred at room temperature for 3h. The reaction was then quenched with dilute acetic acid (pH 4) and the crude product was extracted with dichloromethane. The organic layer was dried over anhydrous sodium sulfate and concentrated under reduced pressure. The crude product was then purified by silica gel chromatography using Combiflash Rf-200 automated flash chromatograph with hexanes-dichloromethane as the eluents. The solvents were evaporated *in vacuo* to give the final product as a deep red solid (120 mg, yield 70%). <sup>1</sup>H NMR (400 MHz; CDCl<sub>3</sub>): δ ppm 6.10 (*s*, 1H), 3.34 (*s*, 1H), 2.60 (*s*, 3H), 2.57 (*s*, 3H), 2.53 (*s*, 3H), 2.47 (*s*, 3H), 2.41 (*s*, 3H).

**betaBDP-alk-Carb (9)**

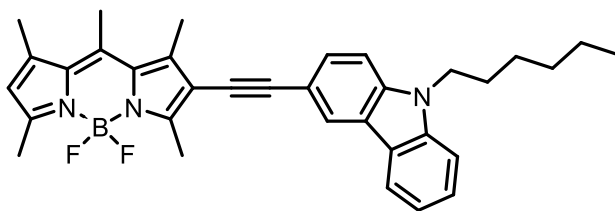

2-ethynyl BODIPY **3** (100 mg, 0.35 mmol) and 3-bromo-*N*-hexylcarbazole **4** (230 mg, 0.7 mmol) were dissolved in anhydrous THF (5 mL) and *N,N*-diisopropyl amine (5 mL). To this solution were added Pd(PPh<sub>3</sub>)<sub>2</sub>Cl<sub>2</sub> (12 mg, 5 mol%) and CuI (7 mg, 10%), and the contents were purged with Ar. The reaction was allowed to proceed at 90°C for 6 h. The solvent was evaporated and the crude product was purified by silica gel chromatography using Combiflash Rf-200 automated flash chromatograph with hexanes-ethyl acetate as the eluents. Evaporation of the solvents yielded an orange-red solid (60 mg, 38%). UV-vis (toluene):  $\lambda_{\text{max}} = 531 \text{ nm}$ ,  $\epsilon = 50,000 \text{ M}^{-1}\text{cm}^{-1}$  ATR-FT-IR (cm<sup>-1</sup>): 3057-3045 (w, sp<sup>2</sup> C-H), 2984-2807 (s, sp<sup>3</sup> C-H), 2207 (w, C≡C) <sup>1</sup>H NMR (500 MHz; CDCl<sub>3</sub>):  $\delta$  ppm 8.27 (*dd*,  $J = 1.6, 0.5 \text{ Hz}$ , 1H), 8.11 (*d*,  $J = 7.8 \text{ Hz}$ , 1H), 7.62 (*dd*,  $J = 8.4, 1.6 \text{ Hz}$ , 1H), 7.49-7.47 (*m*, 1H), 7.42 (*d*,  $J = 8.3 \text{ Hz}$ , 1H), 7.37 (*dd*,  $J = 8.5, 0.5 \text{ Hz}$ , 1H), 7.28-7.24 (*m*, 1H), 6.10 (*s*, 1H), 4.30 (*t*,  $J = 7.3 \text{ Hz}$ , 2H), 2.73 (*s*, 3H), 2.64 (*s*, 3H), 2.61 (*s*, 3H), 2.55 (*s*, 3H), 2.44 (*s*, 3H), 1.91-1.84 (*m*, 2H), 1.35-1.31 (*m*, 4H), 0.87 (*t*,  $J = 7.0 \text{ Hz}$ , 3H). <sup>13</sup>C {<sup>1</sup>H} NMR (125 MHz CDCl<sub>3</sub>):  $\delta$  ppm 155.20, 142.17, 141.66, 140.79, 132.92, 131.15, 129.73, 129.10, 126.10, 123.70, 122.85, 122.45, 121.95, 120.58, 119.30, 115.72, 113.50, 112.08, 110.43, 108.96, 108.77, 97.16, 79.97, 43.23, 31.62, 29.77, 22.61, 17.58, 16.72, 16.11, 14.64, 16.10, 14.64, 14.10, 13.64

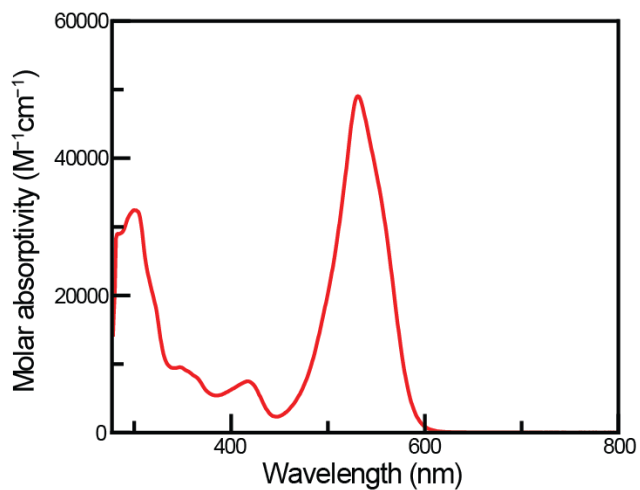

**Figure S16.** UV-Vis (molar absorptivity) of *betaBDP-alk-Carb* in toluene

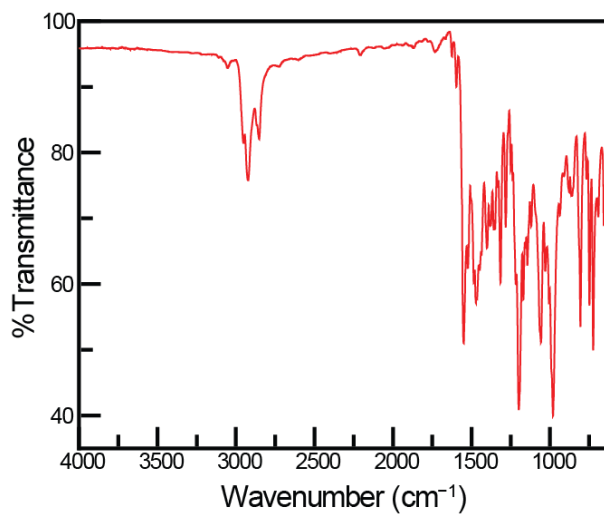

**Figure S17.** ATR-FT-IR of *betaBDP-alk-Carb*

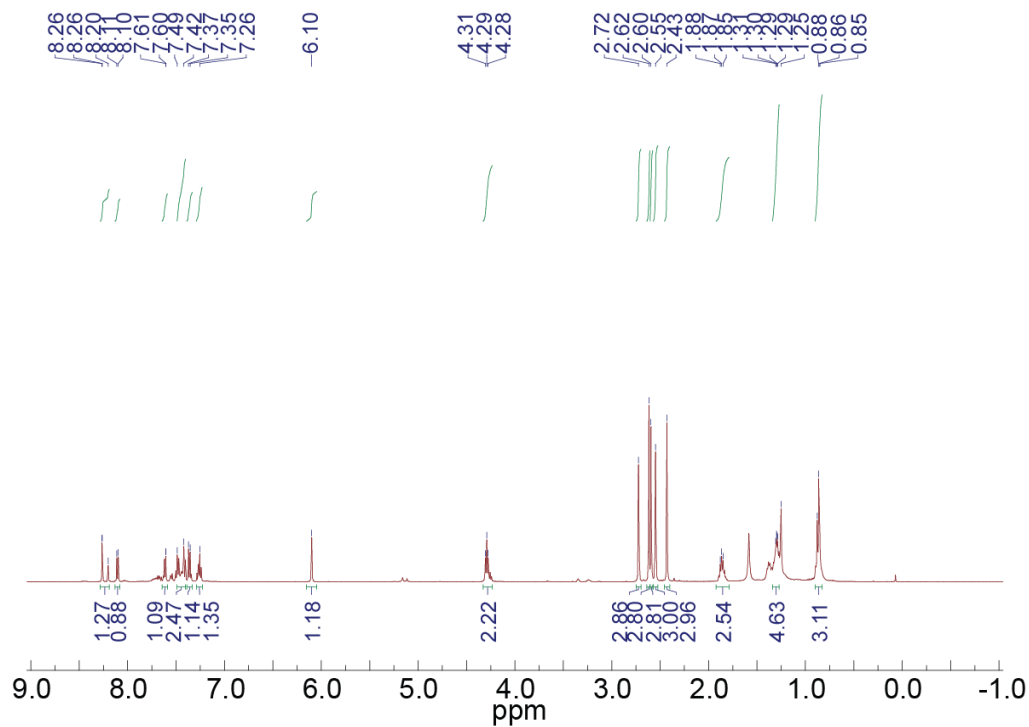

**Figure S18.  $^1\text{H}$  NMR of *beta*BDP-*alk*-Carb**

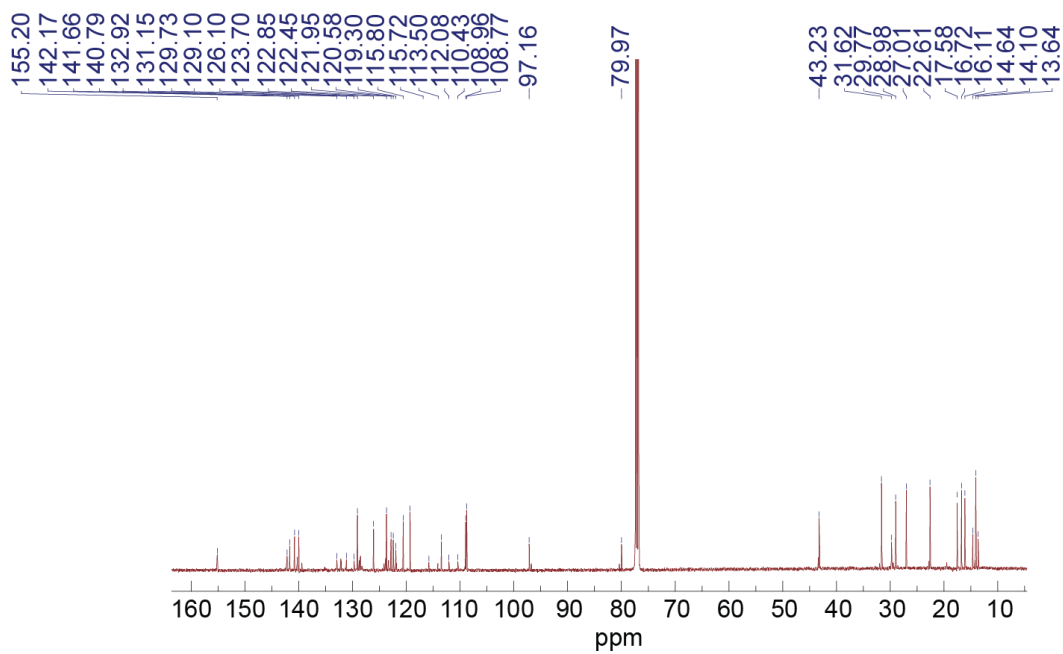

**Figure S19.  $^{13}\text{C}$  NMR of *beta*BDP-*alk*-Carb**



**mesoBDP-Carb (7)**

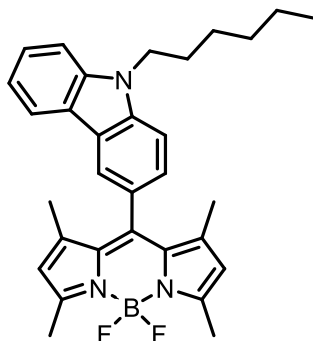

*N*-Hexylcarbazole-3-carbaldehyde **6** (0.7 g, 2.6 mmol) was dissolved in dry CH<sub>2</sub>Cl<sub>2</sub> (200 ml) and the solution was sparged with Ar. 2,4-dimethylpyrrole (0.5 g, 5.25 mmol) was added *via* a syringe and the contents were sparged for additional 5 min. Trifluoroacetic acid (0.1 mL) was added to the flask and the contents were stirred at room temperature for 1.5 h. The reaction was then quenched with 0.1 N NaOH solution and the organic fraction was washed with water, dried over anhydrous MgSO<sub>4</sub> and concentrated *in vacuo*. The residue was dissolved in dry toluene (12 mL) and the flask was purged with Ar. Chloranil (723 mg, 2.9 mmol) was added all at once and the reaction was stirred at room temperature for 5 min. Then, Et<sub>3</sub>N (3 mL) and BF<sub>3</sub>.OEt<sub>2</sub> (3 mL) were added at once and the reaction was stirred for 1.5 h. The reaction mixture was concentrated under reduced pressure and the residue was purified by silica gel chromatography using Combiflash Rf-200 automated flash chromatograph with hexanes-ethyl acetate as the eluents. Evaporation of the solvents yielded the product as an orange-red solid (200 mg, 16%). UV-vis (toluene): λ<sub>max</sub> = 503 nm, ε = 100,000 M<sup>-1</sup>cm<sup>-1</sup> ATR-FT-IR (cm<sup>-1</sup>): 3060-3038 (w, sp<sup>2</sup> C–H) 2990-2812 (s, sp<sup>3</sup> C–H) <sup>1</sup>H NMR (500 MHz; CDCl<sub>3</sub>): δ ppm 8.07 (*d*, *J* = 7.7 Hz, 1H), 7.99 (*d*, *J* = 1.2 Hz, 1H), 7.54-7.51 (*m*,

2H), 7.48 (*d*,  $J = 8.1$  Hz, 1H), 7.33 (*dd*,  $J = 8.3, 1.6$  Hz, 1H), 7.29-7.25 (*m*, 1H), 5.98 (*s*, 2H), 4.36 (*t*,  $J = 7.2$  Hz, 2H), 2.59 (*s*, 6H), 1.93 (*quintet*,  $J = 7.3$  Hz, 2H), 1.45-1.38 (*m*, 6H), 1.32 (*s*, 6H), 0.87 (*t*,  $J = 7.1$  Hz, 3H).  $^{13}\text{C}$  { $^1\text{H}$ } NMR (125 MHz  $\text{CDCl}_3$ ):  $\delta$  ppm 155.15, 143.49, 143.31, 140.81, 140.66, 132.38, 126.36, 125.33, 125.13, 123.31, 122.64, 121.14, 120.64, 120.04, 119.36, 109.49, 109.20, 43.43, 31.65, 29.06, 27.16, 22.71, 14.76, 14.12

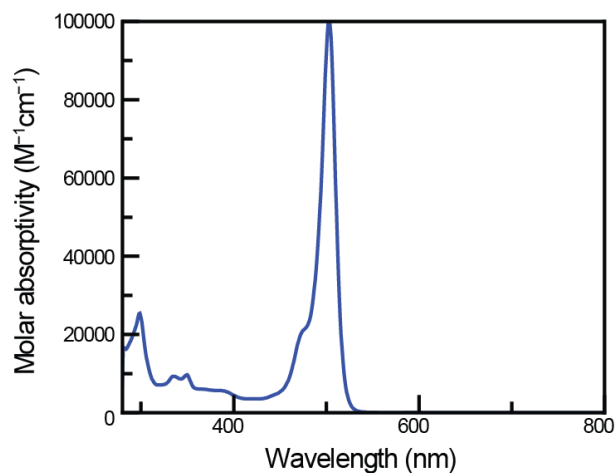

**Figure S20.** UV-Vis (molar absorptivity) of *meso*BDP-Carb in toluene

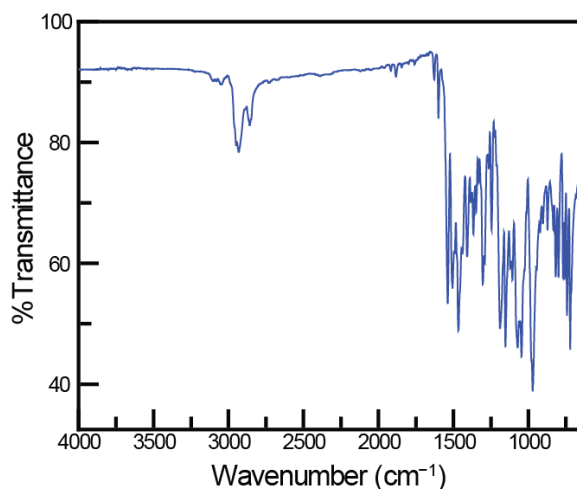

**Figure S21.** ATR-FT-IR of *meso*BDP-Carb

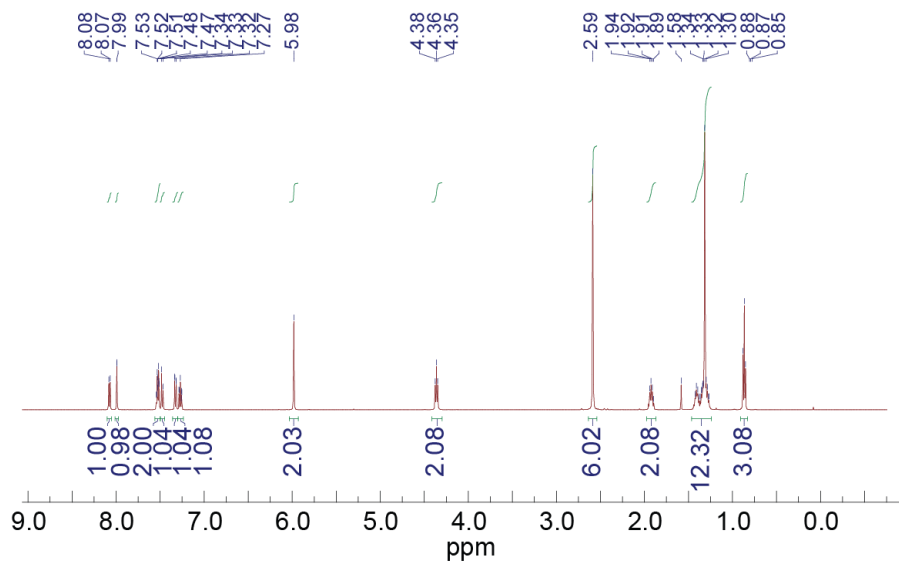

Figure S22.  $^1\text{H}$  NMR of *meso*BDP-Carb

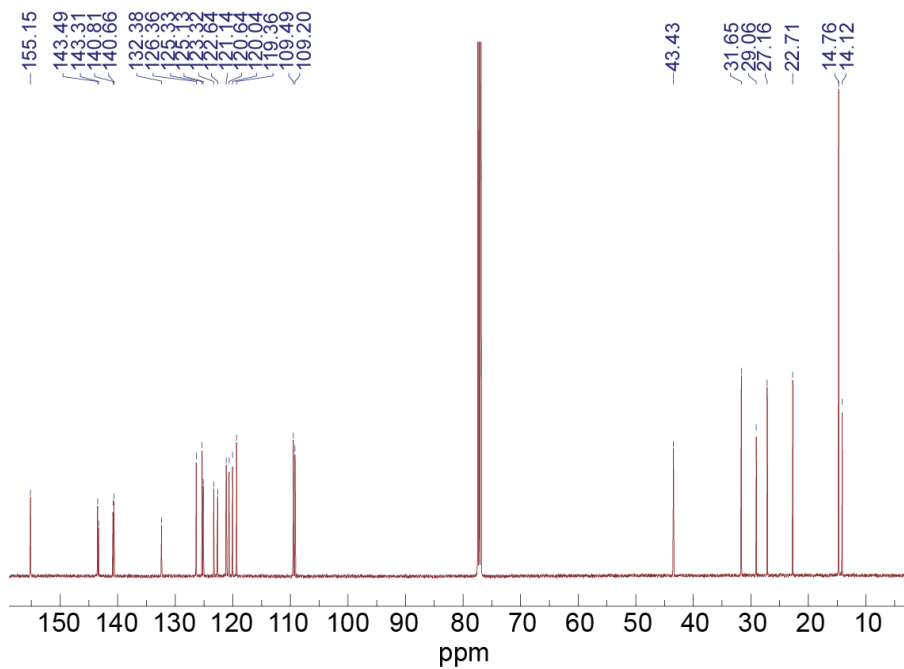

Figure S23.  $^{13}\text{C}$  of *meso*BDP-Carb

#### 4-Bromophenyl BDP (7)

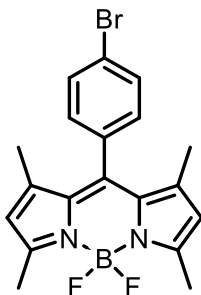

4-Bromobenzaldehyde (0.5 g, 2.6 mmol) was dissolved in dry  $\text{CH}_2\text{Cl}_2$  (200 ml) and the solution was sparged with Ar. 2,4-dimethylpyrrole (0.5 g, 5.25 mmol) was added *via* a syringe and the contents were sparged for additional 5 min. Trifluoroacetic acid (0.1 mL) was added to the flask and the contents were stirred at room temperature for 1.5 h. The reaction was then quenched with 0.1 N NaOH solution and the organic fraction was washed with water, dried over anhydrous  $\text{MgSO}_4$  and concentrated *in vacuo*. The residue was dissolved in dry toluene (12 mL) and the flask was purged with Ar. Chloranil (723 mg, 2.9 mmol) was added all at once and the reaction was stirred at room temperature for 5 min. Then,  $\text{Et}_3\text{N}$  (3 mL) and  $\text{BF}_3 \cdot \text{OEt}_2$  (3 mL) were added at once and the reaction was stirred for 1.5 h. The reaction mixture was concentrated under reduced pressure and the residue was purified by silica gel chromatography using Combiflash Rf-200 automated flash chromatograph with hexanes-ethyl acetate as the eluents. Evaporation of the solvents yielded the product as an orange-red solid (262 mg, 25%).  $^1\text{H}$  NMR (400 MHz;  $\text{CDCl}_3$ ):  $\delta$  ppm 7.64 (*d*,  $J = 8.6$  Hz, 2H), 7.18 (*d*,  $J = 8.6$  Hz, 2H), 5.99 (*s*, 2H), 2.55 (*s*, 6H), 1.41 (*s*, 6H).

**mesoBDP-phen-Carb (11)**

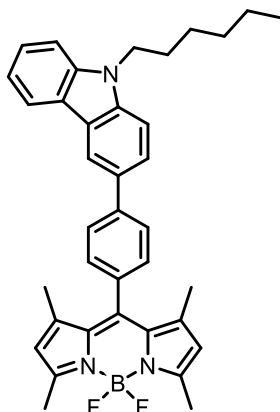

4-bromophenyl BDP (**7**) (88 mg, 0.22 mmol) and *N*-Hexyl-2-(4,4,5,5-tetramethyl-1,3,2-dioxaborolan-2-yl)-carbazole **5** (206 mg, 0.55 mmol) were placed in a 25 mL round bottom flask. To this were added Pd<sub>2</sub>(dba)<sub>3</sub> (13 mg, 10 mol%), P(*t*-Bu)<sub>3</sub>.HBF<sub>4</sub> (26 mg, 40 mol%) and K<sub>2</sub>CO<sub>3</sub> (121 mg, 0.9 mmol). Finally, the solids were suspended in THF (10 mL) and H<sub>2</sub>O (2 mL). The contents of the flask were then heated to reflux and stirred for 24 h. The reaction mixture was passed through a short Celite plug and dried over anhydrous MgSO<sub>4</sub>. After concentration *in vacuo*, the crude product was purified by silica gel chromatography using Combiflash Rf-200 automated flash chromatograph with hexanes-ethyl acetate as the eluents. The final product was further purified by recrystallization from CH<sub>2</sub>Cl<sub>2</sub>/MeOH to yield an orange-red solid (37 mg, 30%). UV-vis (toluene): λ<sub>max</sub> = 504 nm, ε = 75,000 M<sup>-1</sup>cm<sup>-1</sup> ATR-FT-IR (cm<sup>-1</sup>): 3051-3045 (w, sp<sup>2</sup> C-H) 2980-2817 (s, sp<sup>3</sup> C-H) <sup>1</sup>H NMR (500 MHz; CDCl<sub>3</sub>): δ ppm 8.41 (*d*, *J* = 1.6 Hz, 1H), 8.17 (*d*, *J* = 7.6 Hz, 1H), 7.87 (*d*, *J* = 8.4 Hz, 2H), 7.80 (*dd*, *J* = 8 Hz, 2 Hz, 1H), 7.51-7.44 (*m*, 4H), 7.38-7.36 (*m*, 3H), 6.00 (*s*, 2H), 4.35 (*t*, *J* = 7.2 Hz, 2H), 2.58 (*s*, 6H), 1.90 (*quintet*, *J* = 7.2 Hz, 2H), 1.45-1.28 (*m*, 6H), 1.25 (*s*, 6H), 0.87 (*t*, *J* = 7.2 Hz, 3H). <sup>13</sup>C {<sup>1</sup>H} NMR (125 MHz CDCl<sub>3</sub>): δ ppm 155.39, 143.30, 142.79, 142.62, 141.95, 140.94, 140.25, 132.88, 131.61, 130.87, 128.43, 127.89, 127.66, 126.00, 124.92, 123.46, 122.89, 121.22, 120.49, 119.08, 118.86, 109.11, 109.00, 43.29, 31.66, 29.77, 29.03, 27.04, 22.62, 14.73, 14.69, 14.11

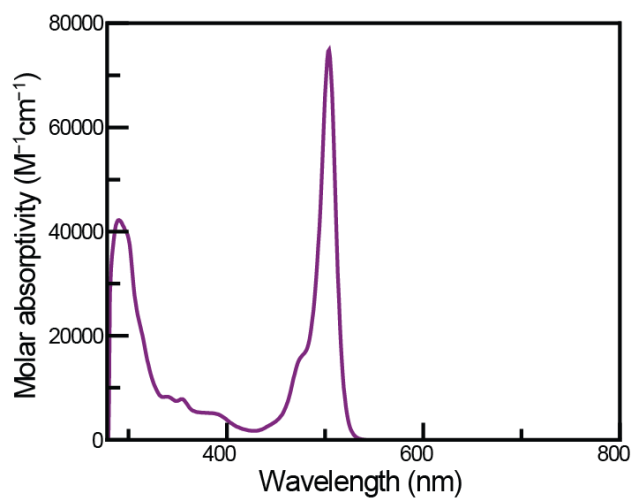

**Figure S24.** UV-Vis (molar absorptivity) of *meso*BDP-*phen*-Carb in toluene

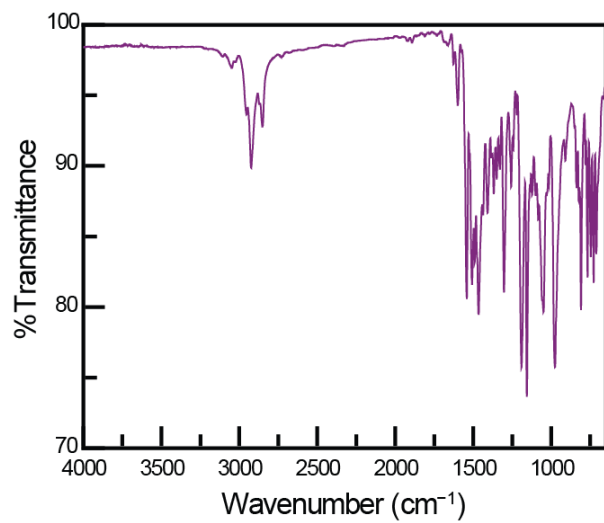

**Figure S25.** ATR-FT-IR of *meso*BDP-*phen*-Carb

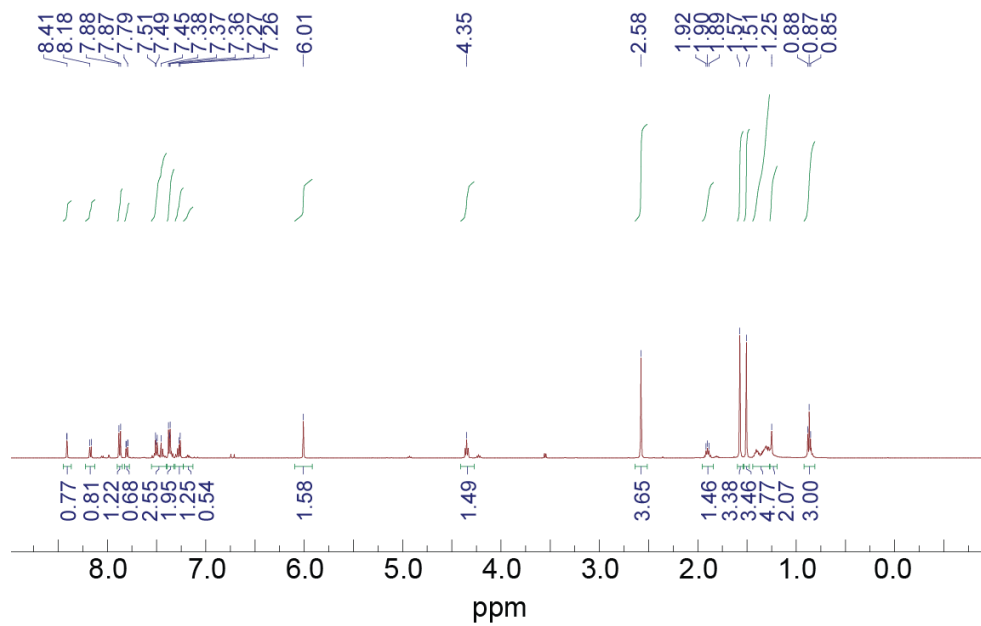

Figure S26.  $^1\text{H}$  NMR of *meso*BDP-phen-Carb

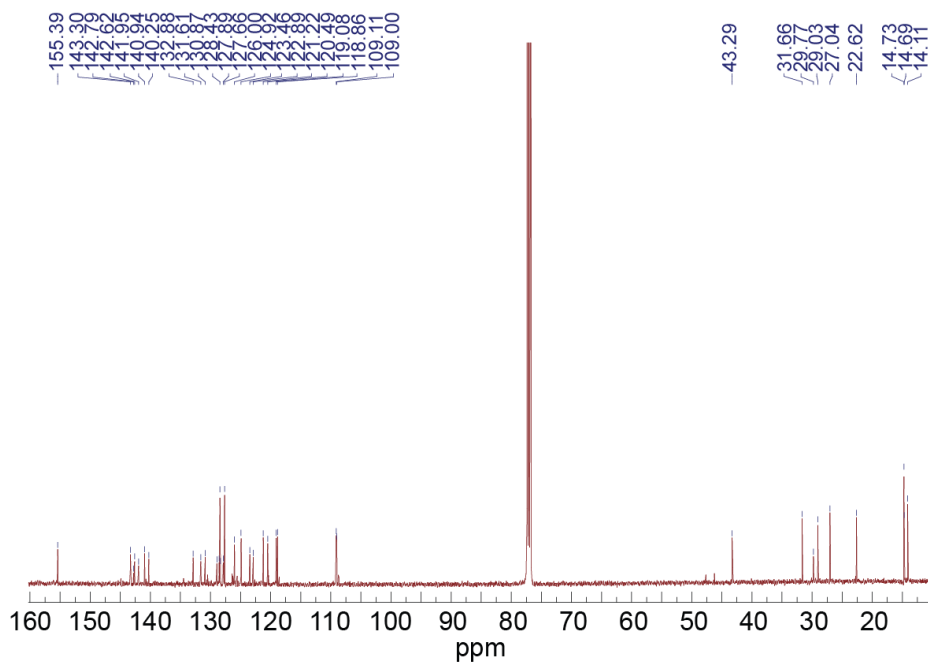

Figure S27.  $^{13}\text{C}$  NMR of *meso*BDP-phen-Carb

## Crystallographic Details

Single crystals of  $C_{31}H_{34}BF_2N_3$  (**mesoBDP-Carb**) were grown from slow evaporation of chloroform. A Bruker D8 Quest diffractometer was used. The crystal was kept at 150.0 K during data collection. Using Olex2<sup>4</sup>, the structure was solved with the XT<sup>5</sup> structure solution program using Intrinsic Phasing and refined with the olex2.refine<sup>6</sup> refinement package using Gauss-Newton minimisation.

**Table 1 Crystal data and structure refinement for mesoBDP-Carb.**

|                                                |                                                                  |
|------------------------------------------------|------------------------------------------------------------------|
| Identification code                            | mesoBDPCarb                                                      |
| Empirical formula                              | $C_{31}H_{34}BF_2N_3$                                            |
| Formula weight                                 | 497.46                                                           |
| Temperature/K                                  | 150.0                                                            |
| Crystal system                                 | triclinic                                                        |
| Space group                                    | P-1                                                              |
| a/Å                                            | 10.053(4)                                                        |
| b/Å                                            | 11.375(4)                                                        |
| c/Å                                            | 12.746(6)                                                        |
| $\alpha/^\circ$                                | 111.34(2)                                                        |
| $\beta/^\circ$                                 | 105.576(18)                                                      |
| $\gamma/^\circ$                                | 90.796(16)                                                       |
| Volume/Å <sup>3</sup>                          | 1297.6(10)                                                       |
| Z                                              | 2                                                                |
| $\rho_{\text{calc}}/\text{cm}^3$               | 1.2731                                                           |
| $\mu/\text{mm}^{-1}$                           | 0.084                                                            |
| F(000)                                         | 528.2                                                            |
| Crystal size/mm <sup>3</sup>                   | 0.3 × 0.1 × 0.07                                                 |
| Radiation                                      | Mo K $\alpha$ ( $\lambda = 0.71073$ )                            |
| 2 $\Theta$ range for data collection/ $^\circ$ | 6.08 to 55.14                                                    |
| Index ranges                                   | -13 ≤ h ≤ 13, -14 ≤ k ≤ 14, -16 ≤ l ≤ 16                         |
| Reflections collected                          | 26242                                                            |
| Independent reflections                        | 5976 [ $R_{\text{int}} = 0.0381$ , $R_{\text{sigma}} = 0.0348$ ] |
| Data/restraints/parameters                     | 5976/0/339                                                       |
| Goodness-of-fit on F <sup>2</sup>              | 1.040                                                            |
| Final R indexes [ $I \geq 2\sigma(I)$ ]        | $R_1 = 0.0446$ , $wR_2 = 0.1034$                                 |
| Final R indexes [all data]                     | $R_1 = 0.0677$ , $wR_2 = 0.1158$                                 |
| Largest diff. peak/hole / e Å <sup>-3</sup>    | 0.42/-0.32                                                       |



## Calculated Transitions from Time-Dependent Density Functional Theory

*meso*BDP-Carb

| Excited State | energy (eV) | wavelength (nm) | Oscillator strength | from orbital | to orbital | Orbital Contribution |
|---------------|-------------|-----------------|---------------------|--------------|------------|----------------------|
| 1             | 2.5346      | 489.16          | 0.0002              | 111          | ->113      | 0.6758               |
|               |             |                 |                     | 112          | ->113      | -0.18002             |
| 2             | 2.9156      | 425.24          | 0.4163              | 109          | ->113      | 0.1134               |
|               |             |                 |                     | 110          | ->113      | 0.32084              |
|               |             |                 |                     | 111          | ->113      | 0.13378              |
|               |             |                 |                     | 112          | ->113      | 0.6076               |
| 3             | 2.9795      | 416.12          | 0.1685              | 110          | ->113      | 0.62448              |
|               |             |                 |                     | 111          | ->113      | -0.13589             |
|               |             |                 |                     | 112          | ->113      | -0.29754             |
| 4             | 3.4784      | 356.44          | 0.0621              | 109          | ->113      | 0.69438              |
|               |             |                 |                     | 112          | ->113      | -0.12223             |
| 5             | 3.7206      | 333.24          | 0.0461              | 108          | ->113      | 0.70409              |
| 6             | 3.875       | 319.96          | 0.0431              | 110          | ->115      | -0.14315             |
|               |             |                 |                     | 111          | ->114      | 0.63795              |
|               |             |                 |                     | 112          | ->114      | -0.25477             |
| 7             | 3.9731      | 312.06          | 0.0204              | 111          | ->114      | 0.25579              |
|               |             |                 |                     | 112          | ->114      | 0.65488              |
| 8             | 3.9839      | 311.22          | 0.0004              | 107          | ->113      | 0.69863              |
| 9             | 4.3827      | 282.89          | 0.1577              | 110          | ->114      | 0.60545              |
|               |             |                 |                     | 111          | ->115      | 0.3235               |
|               |             |                 |                     | 105          | ->113      | 0.6964               |
| 10            | 4.7706      | 259.89          | 0.0076              | 105          | ->113      | 0.6964               |
|               |             |                 |                     | 106          | ->113      | 0.24367              |
|               |             |                 |                     | 112          | ->115      | 0.63989              |
|               |             |                 |                     | 112          | ->116      | 0.10651              |
| 11            | 4.78        | 259.38          | 0.1445              | 106          | ->113      | 0.24367              |
|               |             |                 |                     | 112          | ->115      | 0.63989              |
|               |             |                 |                     | 112          | ->116      | 0.10651              |
|               |             |                 |                     | 106          | ->113      | 0.5117               |
|               |             |                 |                     | 110          | ->114      | 0.12627              |
| 12            | 4.8069      | 257.93          | 0.7955              | 106          | ->113      | 0.5117               |
|               |             |                 |                     | 110          | ->114      | 0.12627              |
|               |             |                 |                     | 111          | ->115      | -0.39181             |
|               |             |                 |                     | 112          | ->115      | -0.19885             |
|               |             |                 |                     | 112          | ->117      | -0.10563             |
| 13            | 5.044       | 245.8           | 0.3807              | 106          | ->113      | 0.32739              |
|               |             |                 |                     | 109          | ->114      | -0.19793             |
|               |             |                 |                     | 110          | ->114      | -0.25994             |
|               |             |                 |                     | 110          | ->116      | 0.12578              |
|               |             |                 |                     | 111          | ->115      | 0.43645              |
|               |             |                 |                     | 111          | ->117      | -0.13719             |
|               |             |                 |                     | 112          | ->115      | -0.12241             |

|    |        |        |        |     |       |          |
|----|--------|--------|--------|-----|-------|----------|
|    |        |        |        | 112 | ->117 | -0.11988 |
|    |        |        |        | 112 | ->118 | 0.10364  |
| 14 | 5.1013 | 243.05 | 0.023  | 109 | ->114 | 0.66855  |
|    |        |        |        | 111 | ->115 | 0.1239   |
| 15 | 5.2095 | 237.99 | 0.03   | 107 | ->114 | 0.11814  |
|    |        |        |        | 110 | ->115 | 0.57903  |
|    |        |        |        | 111 | ->114 | 0.10861  |
|    |        |        |        | 111 | ->116 | -0.31836 |
| 16 | 5.3116 | 233.42 | 0      | 108 | ->114 | 0.70443  |
| 17 | 5.3372 | 232.3  | 0.1067 | 107 | ->114 | 0.58797  |
|    |        |        |        | 110 | ->114 | 0.14192  |
|    |        |        |        | 110 | ->116 | 0.28055  |
|    |        |        |        | 111 | ->116 | 0.1232   |
| 18 | 5.3983 | 229.67 | 0      | 103 | ->113 | 0.42598  |
|    |        |        |        | 104 | ->113 | 0.55687  |
| 19 | 5.5382 | 223.87 | 0.0756 | 107 | ->114 | -0.10468 |
|    |        |        |        | 111 | ->117 | -0.1221  |
|    |        |        |        | 112 | ->115 | -0.11179 |
|    |        |        |        | 112 | ->116 | 0.64287  |
|    |        |        |        | 112 | ->117 | 0.1741   |
| 20 | 5.6087 | 221.06 | 0.2474 | 110 | ->115 | 0.13232  |
|    |        |        |        | 110 | ->116 | -0.13111 |
|    |        |        |        | 111 | ->116 | 0.37308  |
|    |        |        |        | 111 | ->117 | 0.38741  |
|    |        |        |        | 111 | ->118 | 0.18262  |
|    |        |        |        | 112 | ->116 | 0.18092  |
|    |        |        |        | 112 | ->117 | -0.26844 |
| 21 | 5.6813 | 218.23 | 0.0002 | 99  | ->113 | 0.12406  |
|    |        |        |        | 103 | ->113 | 0.55441  |
|    |        |        |        | 104 | ->113 | -0.41463 |
| 22 | 5.7285 | 216.43 | 0.2626 | 105 | ->114 | -0.18594 |
|    |        |        |        | 107 | ->114 | -0.11382 |
|    |        |        |        | 110 | ->115 | 0.25936  |
|    |        |        |        | 111 | ->116 | 0.44126  |
|    |        |        |        | 111 | ->117 | -0.32309 |
|    |        |        |        | 112 | ->116 | -0.10322 |
|    |        |        |        | 112 | ->117 | 0.14608  |
| 23 | 5.821  | 212.99 | 0.0476 | 106 | ->113 | 0.14821  |
|    |        |        |        | 111 | ->117 | 0.32315  |
|    |        |        |        | 112 | ->117 | 0.55715  |
|    |        |        |        | 112 | ->118 | 0.13678  |

|    |        |        |        |     |       |          |
|----|--------|--------|--------|-----|-------|----------|
| 24 | 5.9101 | 209.78 | 0.024  | 107 | ->114 | 0.15367  |
|    |        |        |        | 109 | ->115 | -0.24025 |
|    |        |        |        | 110 | ->116 | -0.28956 |
|    |        |        |        | 110 | ->117 | -0.12118 |
|    |        |        |        | 111 | ->117 | -0.26866 |
|    |        |        |        | 111 | ->118 | 0.44323  |
|    |        |        |        | 112 | ->117 | 0.10207  |
|    |        |        |        | 112 | ->118 | -0.11514 |
| 25 | 5.9338 | 208.95 | 0.0179 | 109 | ->115 | 0.64518  |
|    |        |        |        | 109 | ->116 | 0.10384  |
|    |        |        |        | 110 | ->116 | -0.15326 |
|    |        |        |        | 111 | ->118 | 0.15232  |
| 26 | 6.0173 | 206.05 | 0.0561 | 100 | ->113 | -0.2905  |
|    |        |        |        | 101 | ->113 | 0.22611  |
|    |        |        |        | 102 | ->113 | -0.25536 |
|    |        |        |        | 105 | ->114 | 0.16583  |
|    |        |        |        | 110 | ->116 | 0.15366  |
|    |        |        |        | 110 | ->117 | 0.20591  |
|    |        |        |        | 110 | ->118 | 0.11492  |
|    |        |        |        | 111 | ->118 | 0.32471  |
|    |        |        |        | 112 | ->118 | 0.22028  |
| 27 | 6.0401 | 205.27 | 0.0777 | 100 | ->113 | 0.27428  |
|    |        |        |        | 101 | ->113 | -0.35182 |
|    |        |        |        | 102 | ->113 | 0.13913  |
|    |        |        |        | 105 | ->114 | 0.11368  |
|    |        |        |        | 107 | ->115 | -0.11677 |
|    |        |        |        | 110 | ->117 | 0.18932  |
|    |        |        |        | 112 | ->118 | 0.42078  |
| 28 | 6.0564 | 204.72 | 0.0014 | 106 | ->114 | 0.69276  |
| 29 | 6.1059 | 203.06 | 0.0064 | 100 | ->113 | -0.14723 |
|    |        |        |        | 102 | ->113 | -0.21051 |
|    |        |        |        | 105 | ->114 | -0.17143 |
|    |        |        |        | 105 | ->115 | -0.10482 |
|    |        |        |        | 110 | ->116 | -0.16708 |
|    |        |        |        | 110 | ->117 | -0.34177 |
|    |        |        |        | 110 | ->118 | -0.12222 |
|    |        |        |        | 111 | ->118 | -0.10643 |
|    |        |        |        | 112 | ->118 | 0.41189  |
| 30 | 6.1352 | 202.09 | 0.0003 | 108 | ->115 | 0.68453  |
|    |        |        |        | 108 | ->116 | 0.11171  |
|    |        |        |        | 112 | ->119 | -0.10523 |

*meso*BDP-phen-Carb

| Excited State | energy (eV) | wavelength (nm) | Oscillator Strength | from orbital | to orbital | Orbital Contribution |
|---------------|-------------|-----------------|---------------------|--------------|------------|----------------------|
| 1             | 2.439       | 508.34          | 0.0024              | 132          | ->133      | 0.69865              |
| 2             | 2.8762      | 431.07          | 0.55                | 128          | ->133      | 0.14345              |
|               |             |                 |                     | 131          | ->133      | 0.69529              |
|               |             |                 |                     | 131          | <-133      | -0.10485             |
| 3             | 2.9949      | 413.98          | 0.0002              | 130          | ->133      | 0.70065              |
| 4             | 3.3707      | 367.83          | 0.081               | 128          | ->133      | 0.68868              |
|               |             |                 |                     | 131          | ->133      | -0.14671             |
| 5             | 3.5316      | 351.07          | 0.0002              | 125          | ->133      | 0.16357              |
|               |             |                 |                     | 129          | ->133      | 0.67425              |
| 6             | 3.648       | 339.87          | 0.0467              | 127          | ->133      | 0.70407              |
| 7             | 3.7712      | 328.77          | 0.0329              | 130          | ->135      | 0.15941              |
|               |             |                 |                     | 132          | ->134      | 0.66461              |
|               |             |                 |                     | 132          | ->135      | -0.13198             |
| 8             | 3.7997      | 326.3           | 0.0039              | 126          | ->133      | 0.70593              |
| 9             | 3.9861      | 311.04          | 0.5101              | 130          | ->134      | -0.18963             |
|               |             |                 |                     | 132          | ->134      | 0.14178              |
|               |             |                 |                     | 132          | ->135      | 0.65613              |
| 10            | 4.1253      | 300.54          | 0.0002              | 131          | ->134      | 0.39175              |
|               |             |                 |                     | 131          | ->135      | 0.583                |
| 11            | 4.289       | 289.07          | 0.0007              | 125          | ->133      | 0.67891              |
|               |             |                 |                     | 129          | ->133      | -0.17603             |
| 12            | 4.3242      | 286.72          | 0.0022              | 131          | ->134      | 0.58216              |
|               |             |                 |                     | 131          | ->135      | -0.38817             |
| 13            | 4.3709      | 283.66          | 0.9894              | 129          | ->134      | -0.11174             |
|               |             |                 |                     | 130          | ->134      | 0.62549              |
|               |             |                 |                     | 130          | ->135      | 0.13033              |
|               |             |                 |                     | 132          | ->135      | 0.18445              |
|               |             |                 |                     | 132          | ->137      | -0.11172             |
| 14            | 4.4124      | 280.99          | 0.007               | 126          | ->135      | 0.12573              |
|               |             |                 |                     | 132          | ->136      | 0.67586              |
| 15            | 4.5432      | 272.9           | 0.0032              | 123          | ->133      | -0.1554              |
|               |             |                 |                     | 131          | ->136      | 0.67705              |
| 16            | 4.591       | 270.06          | 0.0995              | 130          | ->135      | 0.63268              |
|               |             |                 |                     | 132          | ->134      | -0.15289             |
|               |             |                 |                     | 132          | ->137      | 0.23411              |
| 17            | 4.8274      | 256.83          | 0.1809              | 123          | ->133      | 0.45245              |
|               |             |                 |                     | 124          | ->133      | -0.45085             |
|               |             |                 |                     | 131          | ->136      | 0.16574              |
|               |             |                 |                     | 131          | ->138      | -0.17916             |

|    |        |        |        |     |       |          |
|----|--------|--------|--------|-----|-------|----------|
| 18 | 4.8334 | 256.52 | 0.0154 | 123 | ->133 | 0.46272  |
|    |        |        |        | 124 | ->133 | 0.52092  |
| 19 | 4.9495 | 250.5  | 0.0012 | 126 | ->135 | 0.10752  |
|    |        |        |        | 130 | ->136 | 0.6719   |
| 20 | 5.049  | 245.56 | 0.0829 | 129 | ->134 | -0.43985 |
|    |        |        |        | 129 | ->135 | 0.10338  |
|    |        |        |        | 130 | ->135 | -0.14596 |
|    |        |        |        | 130 | ->139 | 0.12616  |
|    |        |        |        | 132 | ->137 | 0.45499  |
| 21 | 5.12   | 242.16 | 0.3918 | 129 | ->134 | 0.39131  |
|    |        |        |        | 129 | ->135 | -0.27137 |
|    |        |        |        | 130 | ->134 | 0.16576  |
|    |        |        |        | 130 | ->135 | -0.11448 |
|    |        |        |        | 130 | ->137 | 0.12138  |
|    |        |        |        | 132 | ->137 | 0.40007  |
| 22 | 5.1814 | 239.29 | 0.047  | 126 | ->135 | 0.12457  |
|    |        |        |        | 128 | ->134 | 0.3561   |
|    |        |        |        | 128 | ->135 | 0.49643  |
|    |        |        |        | 129 | ->134 | -0.1105  |
|    |        |        |        | 129 | ->136 | -0.1849  |
|    |        |        |        | 130 | ->136 | -0.13956 |
| 23 | 5.2688 | 235.32 | 0.082  | 129 | ->134 | 0.28779  |
|    |        |        |        | 129 | ->135 | 0.56322  |
|    |        |        |        | 132 | ->139 | 0.14609  |
|    |        |        |        | 132 | ->140 | -0.11426 |
| 24 | 5.3172 | 233.17 | 0.0108 | 125 | ->136 | -0.1365  |
|    |        |        |        | 126 | ->134 | 0.21286  |
|    |        |        |        | 126 | ->135 | 0.39378  |
|    |        |        |        | 128 | ->134 | -0.26855 |
|    |        |        |        | 128 | ->135 | -0.18015 |
|    |        |        |        | 129 | ->136 | -0.35308 |
|    |        |        |        | 130 | ->136 | -0.11408 |
|    |        |        |        | 132 | ->136 | -0.10458 |
| 25 | 5.3597 | 231.33 | 0.0051 | 126 | ->134 | 0.17274  |
|    |        |        |        | 128 | ->134 | 0.51659  |
|    |        |        |        | 128 | ->135 | -0.43294 |
| 26 | 5.3897 | 230.04 | 0.0068 | 129 | ->135 | 0.19559  |
|    |        |        |        | 130 | ->137 | 0.48998  |
|    |        |        |        | 132 | ->139 | -0.3888  |
| 27 | 5.4168 | 228.89 | 0      | 121 | ->133 | 0.65154  |
|    |        |        |        | 122 | ->133 | 0.2473   |

|    |        |        |       |     |       |          |
|----|--------|--------|-------|-----|-------|----------|
| 28 | 5.4531 | 227.37 | 0     | 127 | ->134 | 0.4103   |
|    |        |        |       | 127 | ->135 | 0.57042  |
| 29 | 5.4609 | 227.04 | 0     | 131 | ->137 | 0.69527  |
| 30 | 5.5917 | 221.73 | 0.001 | 126 | ->134 | 0.60843  |
|    |        |        |       | 126 | ->135 | -0.26404 |
|    |        |        |       | 128 | ->134 | -0.10904 |
|    |        |        |       | 128 | ->136 | 0.16657  |

*meso*BDP-*alk*-Carb

| Excited State | energy (eV) | wavelength (nm) | Oscillator strength | from orbital | to orbital | Orbital Contribution |
|---------------|-------------|-----------------|---------------------|--------------|------------|----------------------|
| 1             | 2.4661      | 502.76          | 0.7466              | 117          | ->119      | 0.7044               |
| 2             | 2.6794      | 462.72          | 0.4615              | 118          | ->119      | 0.70393              |
|               |             |                 |                     | 118          | <-119      | -0.10184             |
| 3             | 2.9223      | 424.27          | 0.0737              | 116          | ->119      | 0.70201              |
| 4             | 3.1737      | 390.67          | 0.0289              | 115          | ->119      | 0.69848              |
| 5             | 3.4059      | 364.03          | 0.0115              | 113          | ->119      | 0.52345              |
|               |             |                 |                     | 114          | ->119      | 0.4705               |
| 6             | 3.615       | 342.97          | 0.3107              | 113          | ->119      | -0.46328             |
|               |             |                 |                     | 114          | ->119      | 0.50436              |
|               |             |                 |                     | 117          | ->120      | -0.1163              |
| 7             | 3.8583      | 321.35          | 0.0345              | 114          | ->119      | 0.10958              |
|               |             |                 |                     | 116          | ->121      | -0.13269             |
|               |             |                 |                     | 117          | ->120      | 0.67052              |
| 8             | 3.8595      | 321.24          | 0                   | 111          | ->119      | 0.70252              |
| 9             | 4.0827      | 303.68          | 0.0026              | 118          | ->120      | 0.70446              |
| 10            | 4.329       | 286.41          | 0.0102              | 112          | ->119      | -0.16444             |
|               |             |                 |                     | 116          | ->120      | 0.47051              |
|               |             |                 |                     | 117          | ->121      | 0.48009              |
| 11            | 4.4286      | 279.96          | 0.2283              | 112          | ->119      | 0.61551              |
|               |             |                 |                     | 116          | ->120      | 0.28648              |
|               |             |                 |                     | 117          | ->121      | -0.1002              |
| 12            | 4.5228      | 274.13          | 0.0648              | 118          | ->121      | 0.70034              |
| 13            | 4.7508      | 260.97          | 0.0693              | 110          | ->119      | 0.6747               |
|               |             |                 |                     | 116          | ->120      | 0.11099              |
|               |             |                 |                     | 116          | ->121      | -0.10562             |
|               |             |                 |                     | 117          | ->121      | -0.10462             |
| 14            | 4.83        | 256.7           | 0.6045              | 112          | ->119      | 0.26411              |
|               |             |                 |                     | 114          | ->120      | -0.19236             |
|               |             |                 |                     | 116          | ->120      | -0.33555             |

|    |        |        |        |     |       |          |
|----|--------|--------|--------|-----|-------|----------|
|    |        |        |        | 116 | ->122 | 0.14921  |
|    |        |        |        | 117 | ->121 | 0.45392  |
| 15 | 5.0496 | 245.53 | 0.0689 | 114 | ->120 | -0.11042 |
|    |        |        |        | 116 | ->121 | 0.59438  |
|    |        |        |        | 117 | ->120 | 0.11611  |
|    |        |        |        | 117 | ->122 | -0.30844 |
| 16 | 5.1217 | 242.08 | 0.1905 | 114 | ->120 | 0.54338  |
|    |        |        |        | 115 | ->120 | -0.33876 |
|    |        |        |        | 116 | ->120 | -0.14418 |
|    |        |        |        | 117 | ->121 | 0.10743  |
| 17 | 5.1441 | 241.02 | 0.0422 | 114 | ->120 | 0.30109  |
|    |        |        |        | 115 | ->120 | 0.61725  |
| 18 | 5.3165 | 233.21 | 0      | 108 | ->119 | 0.70194  |
| 19 | 5.3709 | 230.84 | 0.0193 | 113 | ->120 | 0.65021  |
|    |        |        |        | 114 | ->120 | 0.15975  |
|    |        |        |        | 117 | ->122 | 0.17592  |
| 20 | 5.4074 | 229.28 | 0.1181 | 109 | ->119 | 0.15387  |
|    |        |        |        | 113 | ->120 | -0.16915 |
|    |        |        |        | 116 | ->121 | 0.24048  |
|    |        |        |        | 117 | ->122 | 0.51508  |
|    |        |        |        | 117 | ->123 | 0.18975  |
|    |        |        |        | 118 | ->123 | -0.10164 |
|    |        |        |        | 118 | ->124 | 0.13676  |
| 21 | 5.4815 | 226.19 | 0.0064 | 109 | ->119 | 0.52686  |
|    |        |        |        | 117 | ->122 | -0.14778 |
|    |        |        |        | 118 | ->122 | -0.29323 |
|    |        |        |        | 118 | ->123 | -0.14759 |
|    |        |        |        | 118 | ->124 | 0.1582   |
| 22 | 5.4904 | 225.82 | 0.0006 | 114 | ->125 | 0.1615   |
|    |        |        |        | 116 | ->125 | 0.1193   |
|    |        |        |        | 117 | ->125 | 0.65816  |
| 23 | 5.4968 | 225.56 | 0.0033 | 109 | ->119 | 0.25853  |
|    |        |        |        | 118 | ->122 | 0.63053  |
|    |        |        |        | 118 | ->124 | 0.10128  |
| 24 | 5.5675 | 222.69 | 0.2287 | 112 | ->120 | -0.13937 |
|    |        |        |        | 114 | ->121 | 0.27101  |
|    |        |        |        | 115 | ->121 | -0.10692 |
|    |        |        |        | 116 | ->122 | -0.30172 |
|    |        |        |        | 117 | ->122 | -0.14663 |
|    |        |        |        | 117 | ->123 | 0.42572  |
|    |        |        |        | 117 | ->124 | 0.19524  |

|    |        |        |        |     |       |          |
|----|--------|--------|--------|-----|-------|----------|
| 25 | 5.5819 | 222.12 | 0.0038 | 115 | ->121 | 0.68832  |
| 26 | 5.6228 | 220.5  | 0      | 118 | ->125 | 0.70242  |
| 27 | 5.6482 | 219.51 | 0.0134 | 114 | ->121 | 0.55594  |
|    |        |        |        | 116 | ->122 | 0.20291  |
|    |        |        |        | 116 | ->123 | 0.10489  |
|    |        |        |        | 117 | ->123 | -0.16852 |
|    |        |        |        | 118 | ->123 | -0.1556  |
|    |        |        |        | 118 | ->124 | 0.15635  |
| 28 | 5.8261 | 212.81 | 0.0167 | 113 | ->121 | 0.59566  |
|    |        |        |        | 114 | ->121 | 0.1792   |
|    |        |        |        | 116 | ->122 | -0.13339 |
|    |        |        |        | 117 | ->123 | -0.15482 |
|    |        |        |        | 118 | ->123 | 0.14469  |
|    |        |        |        | 118 | ->124 | -0.11315 |
| 29 | 5.8335 | 212.54 | 0.0001 | 111 | ->120 | 0.67454  |
|    |        |        |        | 111 | ->121 | -0.18671 |
| 30 | 5.8447 | 212.13 | 0.1116 | 109 | ->119 | 0.10606  |
|    |        |        |        | 110 | ->120 | 0.16366  |
|    |        |        |        | 112 | ->120 | 0.30154  |
|    |        |        |        | 113 | ->121 | 0.2007   |
|    |        |        |        | 116 | ->122 | 0.25379  |
|    |        |        |        | 117 | ->122 | -0.10803 |
|    |        |        |        | 117 | ->123 | 0.40793  |
|    |        |        |        | 117 | ->124 | -0.17268 |
|    |        |        |        | 118 | ->123 | 0.12437  |

*beta*BDP-Carb

| Excited State | energy (eV) | wavelength (nm) | Oscillator strength | from orbital | to orbital | Orbital Contribution |
|---------------|-------------|-----------------|---------------------|--------------|------------|----------------------|
| 1             | 2.5317      | 489.73          | 0.2505              | 115          | ->117      | 0.18375              |
|               |             |                 |                     | 116          | ->117      | 0.67682              |
| 2             | 2.9657      | 418.06          | 0.5046              | 114          | ->117      | 0.16459              |
|               |             |                 |                     | 115          | ->117      | 0.66323              |
|               |             |                 |                     | 116          | ->117      | -0.16198             |
| 3             | 3.088       | 401.5           | 0.1444              | 114          | ->117      | 0.68362              |
|               |             |                 |                     | 115          | ->117      | -0.14701             |
| 4             | 3.5251      | 351.72          | 0.0846              | 112          | ->117      | -0.18747             |
|               |             |                 |                     | 113          | ->117      | 0.66629              |
| 5             | 3.7354      | 331.91          | 0.0383              | 111          | ->117      | 0.1252               |
|               |             |                 |                     | 112          | ->117      | 0.67009              |
|               |             |                 |                     | 113          | ->117      | 0.17238              |
| 6             | 3.7939      | 326.8           | 0.032               | 114          | ->119      | 0.13016              |



|    |        |        |        |     |       |          |
|----|--------|--------|--------|-----|-------|----------|
|    |        |        |        | 115 | ->118 | 0.18863  |
|    |        |        |        | 116 | ->118 | 0.66309  |
| 7  | 4.176  | 296.89 | 0.0288 | 115 | ->118 | 0.65738  |
|    |        |        |        | 116 | ->118 | -0.20177 |
| 8  | 4.2177 | 293.96 | 0.0007 | 111 | ->117 | 0.68119  |
|    |        |        |        | 113 | ->117 | -0.11786 |
| 9  | 4.3777 | 283.22 | 0.0325 | 114 | ->118 | 0.55635  |
|    |        |        |        | 115 | ->118 | -0.10368 |
|    |        |        |        | 115 | ->119 | -0.17251 |
|    |        |        |        | 116 | ->119 | -0.36371 |
| 10 | 4.7097 | 263.25 | 0.4866 | 110 | ->117 | 0.40852  |
|    |        |        |        | 114 | ->118 | 0.25392  |
|    |        |        |        | 115 | ->119 | -0.10073 |
|    |        |        |        | 116 | ->119 | 0.46957  |
| 11 | 4.7963 | 258.5  | 0.4744 | 110 | ->117 | 0.53254  |
|    |        |        |        | 114 | ->118 | -0.19405 |
|    |        |        |        | 115 | ->121 | -0.10282 |
|    |        |        |        | 116 | ->119 | -0.35115 |
|    |        |        |        | 116 | ->121 | 0.11142  |
| 12 | 4.9033 | 252.86 | 0.0058 | 109 | ->117 | 0.69787  |
| 13 | 4.993  | 248.31 | 0.1039 | 113 | ->118 | -0.34796 |
|    |        |        |        | 114 | ->118 | 0.10266  |
|    |        |        |        | 114 | ->120 | -0.12885 |
|    |        |        |        | 115 | ->119 | 0.56275  |
| 14 | 5.1018 | 243.02 | 0.3615 | 112 | ->118 | 0.12248  |
|    |        |        |        | 113 | ->118 | 0.55029  |
|    |        |        |        | 114 | ->118 | 0.18109  |
|    |        |        |        | 115 | ->119 | 0.32604  |
|    |        |        |        | 116 | ->120 | 0.10214  |
| 15 | 5.141  | 241.17 | 0.0118 | 113 | ->118 | -0.12039 |
|    |        |        |        | 114 | ->119 | 0.51422  |
|    |        |        |        | 115 | ->120 | 0.12231  |
|    |        |        |        | 116 | ->120 | 0.40738  |
| 16 | 5.4063 | 229.33 | 0.0799 | 111 | ->118 | 0.37558  |
|    |        |        |        | 112 | ->118 | -0.2504  |
|    |        |        |        | 114 | ->118 | -0.10711 |
|    |        |        |        | 114 | ->119 | -0.26093 |
|    |        |        |        | 114 | ->120 | -0.2139  |
|    |        |        |        | 116 | ->120 | 0.38029  |
| 17 | 5.4618 | 227    | 0.2309 | 111 | ->118 | -0.20875 |
|    |        |        |        | 112 | ->118 | 0.26924  |

|    |        |        |        |     |       |          |
|----|--------|--------|--------|-----|-------|----------|
|    |        |        |        | 113 | ->118 | -0.10121 |
|    |        |        |        | 114 | ->119 | -0.26756 |
|    |        |        |        | 114 | ->120 | 0.24027  |
|    |        |        |        | 115 | ->122 | 0.11357  |
|    |        |        |        | 116 | ->120 | 0.31524  |
|    |        |        |        | 116 | ->122 | 0.24678  |
| 18 | 5.4855 | 226.02 | 0.0076 | 107 | ->117 | 0.59615  |
|    |        |        |        | 108 | ->117 | 0.34659  |
| 19 | 5.5408 | 223.77 | 0.0496 | 111 | ->118 | 0.25779  |
|    |        |        |        | 112 | ->118 | 0.56683  |
|    |        |        |        | 113 | ->118 | -0.12601 |
|    |        |        |        | 114 | ->120 | -0.17023 |
|    |        |        |        | 116 | ->122 | -0.19226 |
| 20 | 5.6085 | 221.07 | 0.0802 | 110 | ->117 | -0.11451 |
|    |        |        |        | 111 | ->118 | -0.14522 |
|    |        |        |        | 116 | ->120 | 0.10871  |
|    |        |        |        | 116 | ->121 | 0.61819  |
|    |        |        |        | 116 | ->122 | -0.1669  |
| 21 | 5.6271 | 220.33 | 0.0692 | 111 | ->118 | 0.29509  |
|    |        |        |        | 113 | ->119 | 0.10295  |
|    |        |        |        | 115 | ->120 | 0.35172  |
|    |        |        |        | 115 | ->122 | 0.15274  |
|    |        |        |        | 116 | ->120 | -0.207   |
|    |        |        |        | 116 | ->121 | 0.16361  |
|    |        |        |        | 116 | ->122 | 0.39899  |
| 22 | 5.74   | 216    | 0.1858 | 109 | ->118 | -0.13662 |
|    |        |        |        | 114 | ->119 | -0.13251 |
|    |        |        |        | 115 | ->120 | 0.54854  |
|    |        |        |        | 116 | ->121 | -0.17454 |
|    |        |        |        | 116 | ->122 | -0.28899 |
| 23 | 5.8099 | 213.4  | 0.0232 | 112 | ->119 | 0.13336  |
|    |        |        |        | 113 | ->119 | 0.60258  |
|    |        |        |        | 114 | ->120 | -0.10506 |
|    |        |        |        | 114 | ->122 | -0.12717 |
|    |        |        |        | 115 | ->121 | -0.12493 |
|    |        |        |        | 116 | ->121 | -0.101   |
|    |        |        |        | 116 | ->122 | -0.12126 |
| 24 | 5.8491 | 211.97 | 0.0132 | 104 | ->117 | -0.10343 |
|    |        |        |        | 107 | ->117 | -0.33753 |
|    |        |        |        | 108 | ->117 | 0.58759  |
| 25 | 5.9527 | 208.28 | 0.1129 | 110 | ->117 | 0.10848  |

|    |        |        |        |     |       |          |
|----|--------|--------|--------|-----|-------|----------|
|    |        |        |        | 115 | ->121 | 0.64526  |
| 26 | 5.9695 | 207.7  | 0.0189 | 109 | ->118 | -0.15009 |
|    |        |        |        | 111 | ->118 | 0.27942  |
|    |        |        |        | 113 | ->119 | 0.13708  |
|    |        |        |        | 114 | ->120 | 0.43371  |
|    |        |        |        | 114 | ->122 | 0.14847  |
|    |        |        |        | 115 | ->121 | 0.16035  |
|    |        |        |        | 115 | ->122 | 0.21648  |
|    |        |        |        | 116 | ->122 | -0.2137  |
| 27 | 6.0316 | 205.56 | 0.0022 | 115 | ->125 | 0.16837  |
|    |        |        |        | 116 | ->123 | 0.63792  |
|    |        |        |        | 116 | ->125 | 0.17895  |
| 28 | 6.0865 | 203.7  | 0.0151 | 109 | ->118 | 0.21898  |
|    |        |        |        | 110 | ->118 | -0.27471 |
|    |        |        |        | 114 | ->120 | -0.15588 |
|    |        |        |        | 114 | ->122 | -0.20481 |
|    |        |        |        | 115 | ->122 | 0.4973   |
|    |        |        |        | 116 | ->122 | -0.12436 |
| 29 | 6.1049 | 203.09 | 0.0027 | 103 | ->117 | 0.36248  |
|    |        |        |        | 104 | ->117 | 0.27125  |
|    |        |        |        | 105 | ->117 | 0.51427  |
| 30 | 6.1416 | 201.88 | 0.0347 | 109 | ->118 | -0.12176 |
|    |        |        |        | 110 | ->118 | 0.44064  |
|    |        |        |        | 111 | ->118 | -0.13233 |
|    |        |        |        | 114 | ->120 | -0.1804  |
|    |        |        |        | 114 | ->121 | -0.16762 |
|    |        |        |        | 114 | ->122 | 0.22241  |
|    |        |        |        | 115 | ->122 | 0.28541  |
|    |        |        |        | 116 | ->124 | -0.15741 |
|    |        |        |        | 116 | ->125 | 0.11601  |

*betaBDP-phen-Carb*

| Excited State | energy (eV) | wavelength (nm) | Oscillator strength | from orbital | to orbital | Orbital Contribution |
|---------------|-------------|-----------------|---------------------|--------------|------------|----------------------|
| 1             | 2.5535      | 485.54          | 0.2397              | 136          | ->137      | 0.69765              |
| 2             | 2.9117      | 425.81          | 0.6561              | 135          | ->137      | 0.69599              |
| 3             | 3.1884      | 388.86          | 0.0521              | 134          | ->137      | 0.69695              |
| 4             | 3.4187      | 362.67          | 0.1375              | 132          | ->137      | 0.19093              |
|               |             |                 |                     | 133          | ->137      | 0.65215              |
| 5             | 3.6721      | 337.64          | 0.0513              | 131          | ->137      | 0.24239              |

|    |        |        |        |     |       |          |
|----|--------|--------|--------|-----|-------|----------|
|    |        |        |        | 132 | ->137 | 0.64053  |
|    |        |        |        | 133 | ->137 | -0.15501 |
| 6  | 3.7586 | 329.87 | 0.0326 | 134 | ->139 | -0.14159 |
|    |        |        |        | 135 | ->138 | -0.19701 |
|    |        |        |        | 136 | ->138 | 0.6472   |
| 7  | 3.9846 | 311.16 | 0.079  | 129 | ->137 | -0.12697 |
|    |        |        |        | 131 | ->137 | 0.54778  |
|    |        |        |        | 132 | ->137 | -0.18045 |
|    |        |        |        | 133 | ->137 | 0.133    |
|    |        |        |        | 136 | ->139 | 0.32295  |
| 8  | 3.9964 | 310.24 | 0.0065 | 130 | ->137 | 0.68303  |
|    |        |        |        | 131 | ->137 | -0.12957 |
| 9  | 4.0099 | 309.19 | 0.467  | 130 | ->137 | -0.14215 |
|    |        |        |        | 131 | ->137 | -0.28392 |
|    |        |        |        | 134 | ->138 | 0.12579  |
|    |        |        |        | 136 | ->139 | 0.5861   |
| 10 | 4.2122 | 294.35 | 0.0997 | 134 | ->138 | 0.24429  |
|    |        |        |        | 135 | ->138 | 0.52238  |
|    |        |        |        | 135 | ->139 | -0.34834 |
|    |        |        |        | 136 | ->138 | 0.14984  |
| 11 | 4.3359 | 285.95 | 0.0027 | 134 | ->138 | -0.1442  |
|    |        |        |        | 135 | ->138 | 0.38417  |
|    |        |        |        | 135 | ->139 | 0.5262   |
|    |        |        |        | 136 | ->138 | 0.17101  |
| 12 | 4.4375 | 279.4  | 0.7057 | 134 | ->138 | 0.56725  |
|    |        |        |        | 134 | ->139 | -0.1529  |
|    |        |        |        | 135 | ->138 | -0.11158 |
|    |        |        |        | 135 | ->139 | 0.28569  |
|    |        |        |        | 136 | ->139 | -0.10605 |
|    |        |        |        | 136 | ->141 | -0.10514 |
| 13 | 4.4864 | 276.36 | 0.0048 | 130 | ->139 | 0.17358  |
|    |        |        |        | 136 | ->140 | 0.66278  |
| 14 | 4.5581 | 272.01 | 0.0151 | 128 | ->137 | -0.14668 |
|    |        |        |        | 129 | ->137 | 0.6582   |
|    |        |        |        | 131 | ->137 | 0.16417  |
| 15 | 4.6576 | 266.2  | 0.0568 | 134 | ->139 | 0.62798  |
|    |        |        |        | 135 | ->138 | -0.11466 |
|    |        |        |        | 136 | ->138 | 0.10786  |
|    |        |        |        | 136 | ->141 | -0.23001 |
| 16 | 4.789  | 258.89 | 0.0912 | 128 | ->137 | 0.56992  |
|    |        |        |        | 129 | ->137 | 0.12273  |

|    |        |        |        |     |       |          |
|----|--------|--------|--------|-----|-------|----------|
|    |        |        |        | 135 | ->140 | -0.33948 |
|    |        |        |        | 135 | ->142 | -0.12027 |
| 17 | 4.824  | 257.02 | 0.0372 | 128 | ->137 | 0.30877  |
|    |        |        |        | 135 | ->140 | 0.60951  |
| 18 | 4.9333 | 251.32 | 0.0056 | 133 | ->138 | 0.61691  |
|    |        |        |        | 136 | ->141 | 0.25569  |
| 19 | 5.0186 | 247.05 | 0.1379 | 131 | ->138 | 0.10644  |
|    |        |        |        | 133 | ->139 | 0.66274  |
|    |        |        |        | 136 | ->141 | -0.10575 |
| 20 | 5.0509 | 245.47 | 0.0026 | 127 | ->137 | 0.68701  |
|    |        |        |        | 128 | ->137 | -0.13587 |
| 21 | 5.0948 | 243.35 | 0.2918 | 133 | ->138 | -0.24933 |
|    |        |        |        | 134 | ->138 | 0.16935  |
|    |        |        |        | 134 | ->139 | 0.17966  |
|    |        |        |        | 134 | ->140 | -0.25871 |
|    |        |        |        | 136 | ->141 | 0.50562  |
| 22 | 5.134  | 241.5  | 0.0436 | 130 | ->139 | 0.21055  |
|    |        |        |        | 133 | ->140 | 0.13274  |
|    |        |        |        | 134 | ->140 | 0.58441  |
|    |        |        |        | 136 | ->140 | -0.12411 |
|    |        |        |        | 136 | ->141 | 0.17652  |
| 23 | 5.3245 | 232.86 | 0.0351 | 130 | ->138 | -0.25001 |
|    |        |        |        | 130 | ->139 | 0.32985  |
|    |        |        |        | 133 | ->140 | 0.44969  |
|    |        |        |        | 134 | ->140 | -0.26755 |
|    |        |        |        | 136 | ->140 | -0.14035 |
| 24 | 5.3577 | 231.42 | 0.0204 | 131 | ->138 | -0.26315 |
|    |        |        |        | 131 | ->139 | -0.10378 |
|    |        |        |        | 132 | ->138 | 0.2236   |
|    |        |        |        | 133 | ->138 | 0.10881  |
|    |        |        |        | 133 | ->139 | 0.11325  |
|    |        |        |        | 134 | ->141 | 0.37859  |
|    |        |        |        | 135 | ->141 | 0.14804  |
|    |        |        |        | 135 | ->143 | -0.10823 |
|    |        |        |        | 136 | ->143 | 0.28533  |
| 25 | 5.4316 | 228.26 | 0.0007 | 130 | ->138 | 0.11187  |
|    |        |        |        | 131 | ->138 | -0.30892 |
|    |        |        |        | 131 | ->139 | 0.13437  |
|    |        |        |        | 132 | ->138 | 0.35901  |
|    |        |        |        | 132 | ->139 | -0.13662 |
|    |        |        |        | 135 | ->141 | -0.32698 |

|    |        |        |        |     |       |          |
|----|--------|--------|--------|-----|-------|----------|
|    |        |        |        | 135 | ->143 | 0.10939  |
|    |        |        |        | 136 | ->141 | -0.13334 |
|    |        |        |        | 136 | ->143 | -0.19971 |
|    |        |        |        | 136 | ->144 | -0.10571 |
| 26 | 5.4637 | 226.92 | 0.0025 | 130 | ->138 | 0.61133  |
|    |        |        |        | 130 | ->139 | 0.18567  |
|    |        |        |        | 131 | ->139 | 0.11921  |
|    |        |        |        | 132 | ->139 | -0.10526 |
|    |        |        |        | 133 | ->140 | 0.1661   |
|    |        |        |        | 135 | ->141 | 0.12243  |
| 27 | 5.4813 | 226.2  | 0.0884 | 130 | ->138 | -0.10603 |
|    |        |        |        | 131 | ->139 | 0.18914  |
|    |        |        |        | 132 | ->138 | 0.1626   |
|    |        |        |        | 132 | ->139 | -0.1938  |
|    |        |        |        | 134 | ->141 | -0.11764 |
|    |        |        |        | 135 | ->141 | 0.53184  |
|    |        |        |        | 136 | ->143 | -0.21861 |
| 28 | 5.4924 | 225.74 | 0.0017 | 124 | ->137 | -0.18952 |
|    |        |        |        | 125 | ->137 | 0.6503   |
|    |        |        |        | 126 | ->137 | 0.15981  |
| 29 | 5.5251 | 224.4  | 0.002  | 130 | ->138 | 0.13321  |
|    |        |        |        | 131 | ->139 | -0.36579 |
|    |        |        |        | 132 | ->138 | 0.14721  |
|    |        |        |        | 132 | ->139 | 0.38885  |
|    |        |        |        | 134 | ->141 | -0.27    |
|    |        |        |        | 134 | ->143 | 0.12678  |
|    |        |        |        | 135 | ->141 | 0.12793  |
|    |        |        |        | 136 | ->143 | -0.11017 |
| 30 | 5.6025 | 221.3  | 0.0096 | 131 | ->138 | 0.42778  |
|    |        |        |        | 131 | ->139 | -0.16791 |
|    |        |        |        | 132 | ->138 | 0.4602   |
|    |        |        |        | 132 | ->139 | -0.19578 |
|    |        |        |        | 136 | ->143 | 0.1278   |

*betaBDP-alk-Carb*

| Excited State | Energy (eV) | Wavelength | Oscillator strength | from orbital | to orbital | contribution |
|---------------|-------------|------------|---------------------|--------------|------------|--------------|
| 1             | 2.2895      | 541.54     | 0.4344              | 122          | ->123      | 0.70053      |
| 2             | 2.9891      | 414.79     | 0.4828              | 120          | ->123      | -0.12031     |
|               |             |            |                     | 121          | ->123      | 0.68954      |
| 3             | 3.1548      | 393.01     | 0.2249              | 120          | ->123      | 0.69066      |
|               |             |            |                     | 121          | ->123      | 0.11506      |
| 4             | 3.4686      | 357.45     | 0.1253              | 118          | ->123      | 0.18309      |
|               |             |            |                     | 119          | ->123      | 0.66081      |
| 5             | 3.6172      | 342.76     | 0.0307              | 120          | ->125      | -0.11967     |
|               |             |            |                     | 121          | ->124      | 0.10697      |
|               |             |            |                     | 122          | ->124      | 0.6644       |
| 6             | 3.6655      | 338.25     | 0.0631              | 118          | ->123      | 0.66838      |
|               |             |            |                     | 119          | ->123      | -0.18751     |
| 7             | 3.9168      | 316.54     | 0.0676              | 120          | ->124      | 0.11254      |
|               |             |            |                     | 122          | ->125      | 0.67508      |
| 8             | 4.23        | 293.11     | 0.0231              | 116          | ->123      | -0.37412     |
|               |             |            |                     | 117          | ->123      | 0.46503      |
|               |             |            |                     | 120          | ->124      | -0.13371     |
|               |             |            |                     | 121          | ->124      | 0.29531      |
| 9             | 4.2345      | 292.8      | 0.2544              | 116          | ->123      | 0.22259      |
|               |             |            |                     | 117          | ->123      | -0.25866     |
|               |             |            |                     | 120          | ->124      | -0.24749     |
|               |             |            |                     | 121          | ->124      | 0.51035      |
|               |             |            |                     | 121          | ->125      | -0.10242     |
| 10            | 4.3083      | 287.78     | 0.0175              | 116          | ->123      | 0.53943      |
|               |             |            |                     | 117          | ->123      | 0.43087      |
| 11            | 4.4391      | 279.3      | 0.124               | 120          | ->124      | 0.45876      |
|               |             |            |                     | 120          | ->125      | -0.14356     |
|               |             |            |                     | 121          | ->124      | 0.30016      |
|               |             |            |                     | 121          | ->125      | 0.37593      |
|               |             |            |                     | 122          | ->124      | -0.11617     |
| 12            | 4.5859      | 270.36     | 0.3766              | 119          | ->124      | -0.12139     |
|               |             |            |                     | 120          | ->124      | -0.34484     |
|               |             |            |                     | 120          | ->125      | 0.12845      |
|               |             |            |                     | 121          | ->125      | 0.54367      |
|               |             |            |                     | 122          | ->126      | 0.10539      |
| 13            | 4.7105      | 263.21     | 0.1225              | 115          | ->123      | 0.64799      |
|               |             |            |                     | 120          | ->125      | -0.13513     |
|               |             |            |                     | 121          | ->127      | -0.10229     |
|               |             |            |                     | 122          | ->127      | 0.10884      |

|    |        |        |        |     |       |          |
|----|--------|--------|--------|-----|-------|----------|
| 14 | 4.7404 | 261.55 | 0.0108 | 115 | ->123 | 0.16009  |
|    |        |        |        | 120 | ->125 | 0.55869  |
|    |        |        |        | 121 | ->124 | 0.12791  |
|    |        |        |        | 122 | ->126 | -0.33424 |
| 15 | 4.9215 | 251.92 | 0.0483 | 114 | ->123 | -0.18691 |
|    |        |        |        | 119 | ->124 | 0.51589  |
|    |        |        |        | 119 | ->125 | 0.13347  |
|    |        |        |        | 120 | ->125 | 0.18692  |
|    |        |        |        | 121 | ->124 | 0.10757  |
|    |        |        |        | 122 | ->126 | 0.32131  |
| 16 | 4.987  | 248.62 | 0.0138 | 114 | ->123 | 0.65926  |
|    |        |        |        | 119 | ->124 | 0.21223  |
| 17 | 5.0717 | 244.46 | 0.3896 | 114 | ->123 | 0.12441  |
|    |        |        |        | 119 | ->124 | -0.34568 |
|    |        |        |        | 120 | ->124 | 0.17747  |
|    |        |        |        | 120 | ->125 | 0.24883  |
|    |        |        |        | 121 | ->125 | -0.10732 |
|    |        |        |        | 122 | ->126 | 0.46674  |
|    |        |        |        | 122 | ->128 | 0.1198   |
| 18 | 5.1266 | 241.84 | 0.007  | 119 | ->124 | -0.1384  |
|    |        |        |        | 119 | ->125 | 0.62494  |
|    |        |        |        | 122 | ->128 | 0.10739  |
| 19 | 5.2518 | 236.08 | 0.0062 | 119 | ->129 | 0.12094  |
|    |        |        |        | 122 | ->127 | -0.13311 |
|    |        |        |        | 122 | ->129 | 0.58019  |
|    |        |        |        | 122 | ->130 | -0.19178 |
|    |        |        |        | 122 | ->131 | -0.20661 |
| 20 | 5.3627 | 231.2  | 0.0225 | 113 | ->123 | -0.28945 |
|    |        |        |        | 119 | ->125 | -0.10729 |
|    |        |        |        | 122 | ->127 | 0.5799   |
|    |        |        |        | 122 | ->129 | 0.11885  |
| 21 | 5.3828 | 230.33 | 0.0806 | 113 | ->123 | 0.14466  |
|    |        |        |        | 119 | ->125 | -0.14679 |
|    |        |        |        | 120 | ->124 | -0.10514 |
|    |        |        |        | 120 | ->126 | -0.24948 |
|    |        |        |        | 121 | ->126 | 0.1496   |
|    |        |        |        | 121 | ->128 | 0.11671  |
|    |        |        |        | 122 | ->128 | 0.53742  |
| 22 | 5.4669 | 226.79 | 0.0026 | 112 | ->123 | 0.20207  |
|    |        |        |        | 115 | ->125 | 0.12075  |
|    |        |        |        | 116 | ->124 | -0.26909 |



|    |        |        |        |     |       |          |
|----|--------|--------|--------|-----|-------|----------|
|    |        |        |        | 116 | ->125 | 0.53863  |
|    |        |        |        | 117 | ->124 | 0.14143  |
|    |        |        |        | 117 | ->125 | -0.16936 |
| 23 | 5.519  | 224.65 | 0.0821 | 112 | ->123 | 0.51274  |
|    |        |        |        | 113 | ->123 | -0.34033 |
|    |        |        |        | 117 | ->124 | -0.12063 |
|    |        |        |        | 118 | ->124 | 0.10931  |
|    |        |        |        | 122 | ->127 | -0.18104 |
|    |        |        |        | 122 | ->128 | 0.14998  |
| 24 | 5.5423 | 223.71 | 0.0765 | 112 | ->123 | 0.38601  |
|    |        |        |        | 113 | ->123 | 0.24019  |
|    |        |        |        | 116 | ->125 | -0.19387 |
|    |        |        |        | 117 | ->124 | 0.17295  |
|    |        |        |        | 118 | ->124 | -0.32854 |
|    |        |        |        | 120 | ->126 | -0.12587 |
|    |        |        |        | 122 | ->127 | 0.10703  |
|    |        |        |        | 122 | ->128 | -0.19915 |
| 25 | 5.5507 | 223.37 | 0.036  | 112 | ->123 | 0.19471  |
|    |        |        |        | 113 | ->123 | 0.4099   |
|    |        |        |        | 117 | ->124 | -0.18518 |
|    |        |        |        | 118 | ->124 | 0.39578  |
|    |        |        |        | 120 | ->126 | 0.13644  |
|    |        |        |        | 122 | ->127 | 0.19754  |
| 26 | 5.6216 | 220.55 | 0.0154 | 117 | ->124 | 0.33354  |
|    |        |        |        | 118 | ->124 | 0.43012  |
|    |        |        |        | 118 | ->125 | -0.1281  |
|    |        |        |        | 120 | ->126 | -0.27183 |
|    |        |        |        | 122 | ->128 | -0.19127 |
| 27 | 5.6639 | 218.9  | 0.0247 | 117 | ->124 | -0.18772 |
|    |        |        |        | 117 | ->125 | -0.14057 |
|    |        |        |        | 118 | ->125 | 0.23906  |
|    |        |        |        | 121 | ->126 | 0.56818  |
|    |        |        |        | 122 | ->128 | -0.10419 |
| 28 | 5.717  | 216.87 | 0.018  | 118 | ->124 | 0.16382  |
|    |        |        |        | 118 | ->125 | 0.62039  |
|    |        |        |        | 120 | ->126 | -0.10549 |
|    |        |        |        | 121 | ->126 | -0.23735 |
| 29 | 5.7769 | 214.62 | 0.002  | 116 | ->124 | 0.42208  |
|    |        |        |        | 116 | ->125 | 0.17884  |
|    |        |        |        | 117 | ->124 | -0.27478 |
|    |        |        |        | 117 | ->125 | -0.21349 |

|    |        |        |        |     |       |          |
|----|--------|--------|--------|-----|-------|----------|
|    |        |        |        | 118 | ->125 | -0.11684 |
|    |        |        |        | 120 | ->126 | -0.27939 |
|    |        |        |        | 120 | ->128 | -0.13318 |
|    |        |        |        | 121 | ->126 | -0.13723 |
| 30 | 5.8338 | 212.53 | 0.0017 | 115 | ->124 | 0.16387  |
|    |        |        |        | 116 | ->124 | 0.44141  |
|    |        |        |        | 116 | ->125 | 0.19609  |
|    |        |        |        | 117 | ->124 | 0.25919  |
|    |        |        |        | 120 | ->126 | 0.26887  |
|    |        |        |        | 120 | ->128 | 0.16712  |
|    |        |        |        | 121 | ->126 | 0.10616  |
|    |        |        |        | 121 | ->128 | -0.10784 |

1. Nepomnyashchii, A.; Bröring, M.; Ahrens, J.; Bard, A. J.: Synthesis, Photophysical, Electrochemical, and Electrogenerated Chemiluminescence Studies. Multiple Sequential Electron Transfers in BODIPY Monomers, Dimers, Trimers, and Polymer. *J. Am. Chem. Soc.* **2011**, *133*, 8633–8645.
2. Rihn, S.; Erdem, M.; De Nicola, A.; Retailleau, P.; Ziessel, R.: Phenyliodine(III) Bis(trifluoroacetate) (PIFA)-Promoted Synthesis of Bodipy Dimers Displaying Unusual Redox Properties. *Org. Lett.* **2011**, *13*, 1916–1919.
3. Grisorio, R.; Piliago, C.; Fini, P.; Cosma, P.; Mastroilli, P.; Gigli, G.; Suranna, G. P.; Nobile, C. F.: Influencing the Spectral Stability and the Electroluminescence Behavior of New Blue-Emitting Bifluorene-Based Materials by the 7,7'-Functionalization of the Core. *J. Phys. Chem. C* **2008**, *112*, 7005-7014.
4. Dolomanov, O.V., Bourhis, L.J., Gildea, R.J., Howard, J.A.K. & Puschmann, H. (2009), *J. Appl. Cryst.* *42*, 339-341.
5. Sheldrick, G.M. (2015). *Acta Cryst.* *A71*, 3-8.
6. Bourhis, L.J., Dolomanov, O.V., Gildea, R.J., Howard, J.A.K., Puschmann, H. (2015). *Acta Cryst.* *A71*, 59-75.
